# Supplementary material for: Ca2+-saturated calmodulin binds tightly to the N-terminal domain of A-type fibroblast growth factor homologous factors
Source: PubMed Central journal article supplement (PMC8059062; doi:10.1016/j.jbc.2021.100458), 2021-02-24
Supplement: mmc1.pdf [file mmc1.pdf]

# Supporting Information

for

## Ca<sup>2+</sup>-Saturated calmodulin binds tightly to the N-terminal domain of A-type fibroblast growth factor homologous factors

Ryan Mahling, Cade R. Rahlf, Samuel C. Hansen, Matthew R. Hayden, and Madeline A. Shea\*

Department of Biochemistry, Carver College of Medicine, University of Iowa  
Iowa City, IA, 52242-1109, USA

### Author ORCID Identifiers

|         |                                                                         |
|---------|-------------------------------------------------------------------------|
| Hansen  | <a href="https://orcid.org/0000-0003-4114-1355">0000-0003-4114-1355</a> |
| Hayden  | <a href="https://orcid.org/0000-0002-9680-6644">0000-0002-9680-6644</a> |
| Mahling | <a href="https://orcid.org/0000-0002-4590-2724">0000-0002-4590-2724</a> |
| Rahlf   | <a href="https://orcid.org/0000-0001-9748-247X">0000-0001-9748-247X</a> |
| Shea    | <a href="https://orcid.org/0000-0003-0814-7069">0000-0003-0814-7069</a> |

\*Corresponding author:

E-mail: [madeline-shea@uiowa.edu](mailto:madeline-shea@uiowa.edu)

Telephone: (319) 335-7885

FAX: (319) 335-9570

These studies were supported by the Interdisciplinary Training in Pain Research Program NIH T32 NS045549 (RM); Iowa Center for Research by Undergraduates (ICRU); University of Iowa Carver College of Medicine FUTURE in Biomedicine Fellowship (MRH); the US National Institutes of Health R01 GM57001 (MAS). The content of this manuscript is solely the responsibility of the authors and does not necessarily represent the official views of the US National Institutes of Health.

**Running Title:** (Ca<sup>2+</sup>)<sub>4</sub>-CaM Tightly Binds the NTD of A-Type FGFs

**Keywords:** Molecular recognition, Ca<sup>2+</sup>-dependent interaction, voltage-gated sodium channel, protein-protein interaction, NMR, FRET, FHF, Biosensor, Thermodynamics, Allostery, Affinity

## References

### Supporting Information – Figure Legends

1. Crooks, G. E., Hon, G., Chandonia, J. M., and Brenner, S. E. (2004) WebLogo: a sequence logo generator. *Genome Res* **14**, 1188-1190  
(Unique to Supporting Information, Figure S1)
2. Gautier, R., Douguet, D., Antony, B., and Drin, G. (2008) HELIQUEST: a web server to screen sequences with specific alpha-helical properties. *Bioinformatics (Oxford, England)* **24**, 2101-2102  
(Same as reference 97 in primary article)
3. Shen, Y., and Bax, A. (2010) SPARTA+: a modest improvement in empirical NMR chemical shift prediction by means of an artificial neural network. *J Biomol NMR* **48**, 13-22  
(Same as reference 55 in primary article)

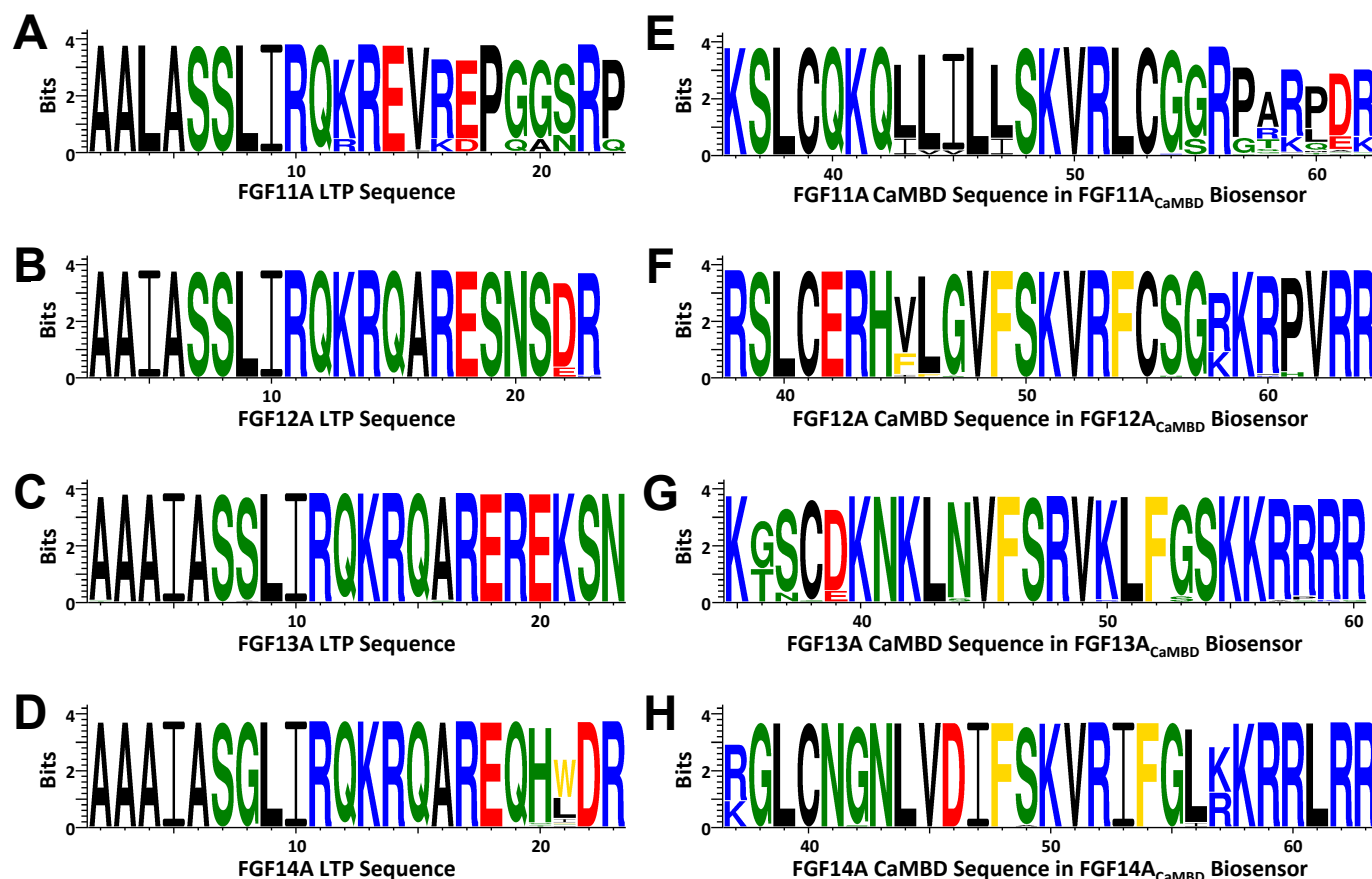

**Figure S1** (Related to Fig. 2)

**Comparison of A-Type FGF LTP and CaMBD Sequences Contained in Biosensors**

**A-D:** Weblogo [1] comparison of the FGF11A (**A**, a.a. 2 – 23, 60 species), FGF12A (**B**, a.a. 3 – 23, 56 species), FGF13A (**C**, a.a. 2 – 23, 63 species), and FGF14A (**D**, a.a. 2 – 23, 48 species) LTP sequences across species.

**E-H:** Weblogo [1] comparison of the FGF11A (**E**, a.a. 36 – 62, 60 species), FGF12A (**F**, a.a. 38 – 64, 56 species), FGF13A (**G**, a.a. 35 – 60, 53 species) and FGF14A (**H**, a.a. 37 – 63, 48 species) sequences used in the CaMBD biosensors across species.

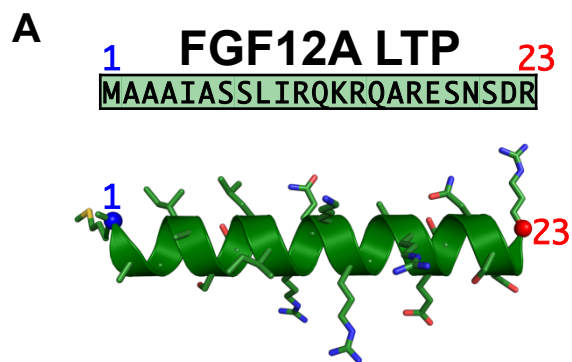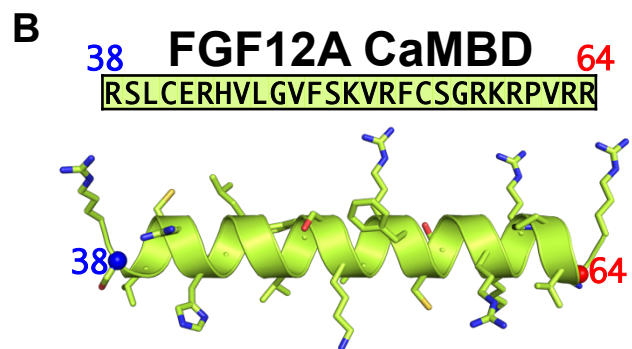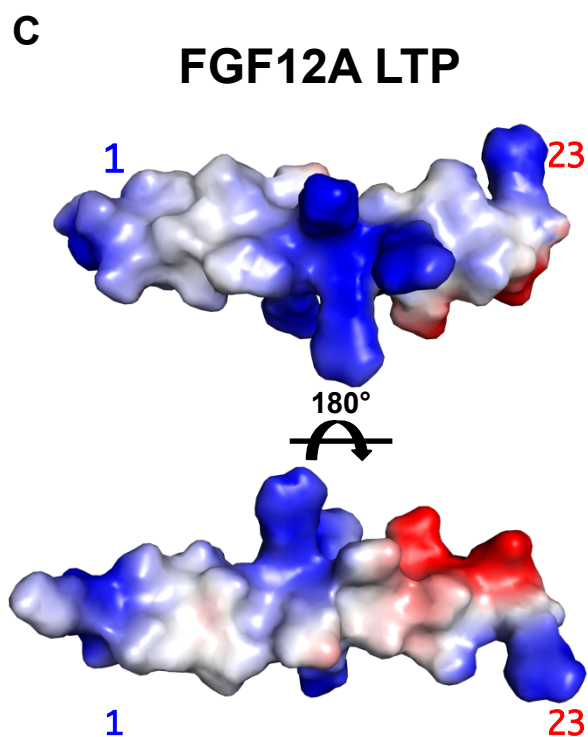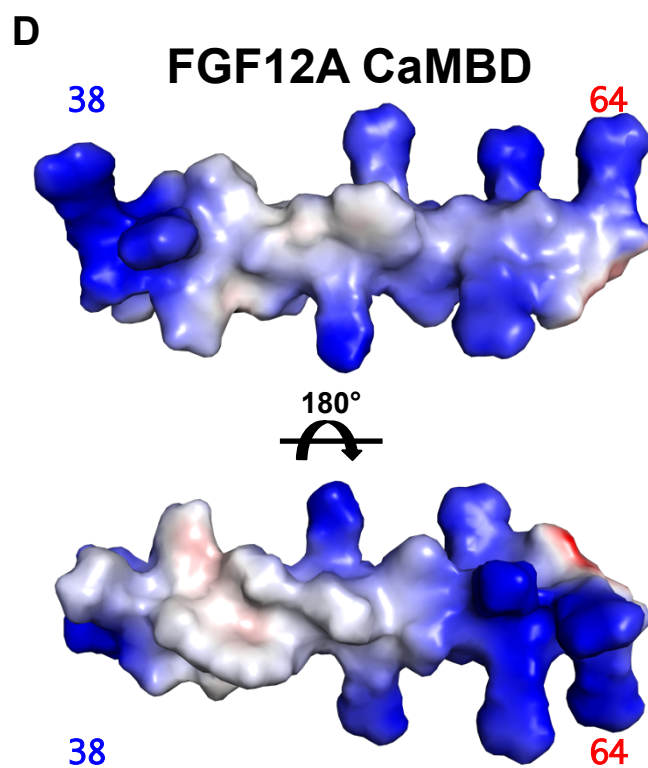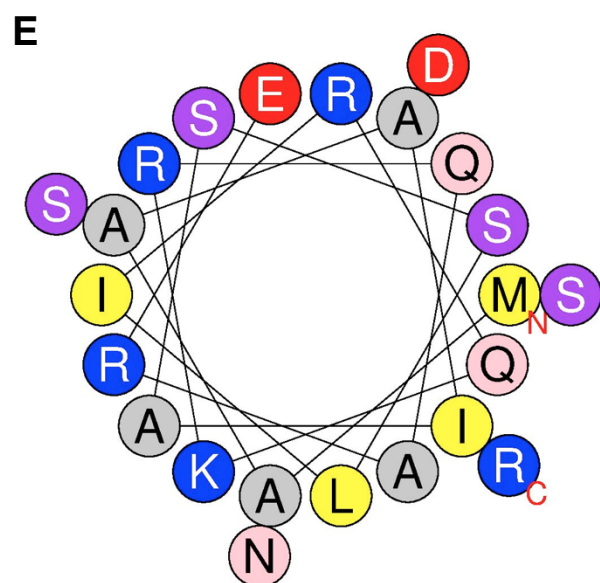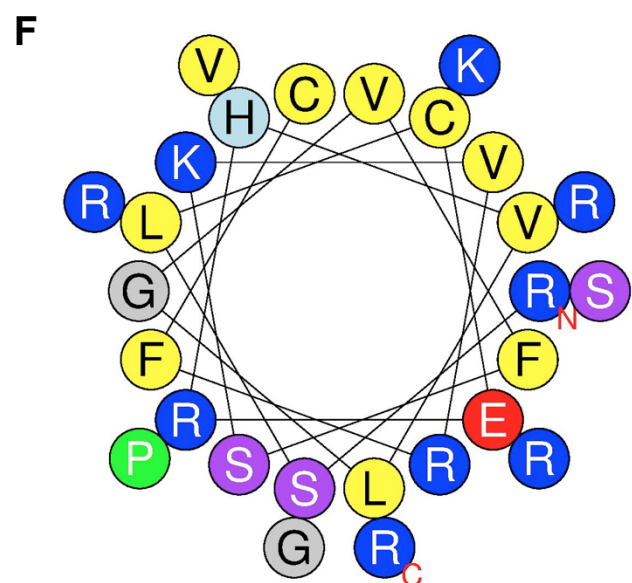

**Figure S2** (Related to Fig. 2)**Models of FGF12A LTP and CaMBD**

**A:** Top: Human FGF12A LTP (a.a. 1-23) sequence. Bottom: FGF12A LTP sequences depicted as sticks on a modeled  $\alpha$ -helix.  $C\alpha$  of residues 1 (blue) and 23 (red) are spheres.

**B:** Top: Human FGF12A CaMBD (a.a. 38-64) sequence. Bottom: FGF12A CaMBD sequence depicted as sticks on a modeled  $\alpha$ -helix.  $C\alpha$  of residues 38 (blue) and 64 (red) are spheres.

**C-D:** Calculated vacuum electrostatic surface (positive/blue, negative/red, neutral/white) of the FGF12A LTP (**C**) and FGF12A CaMBD (**D**).

**E-F:** Helical wheels of FGF12A LTP (**E**) and FGF12A CaMBD (**F**). Helical wheels were generated with HeliQuest (<https://heliquet.ipmc.cnrs.fr/>) [2].

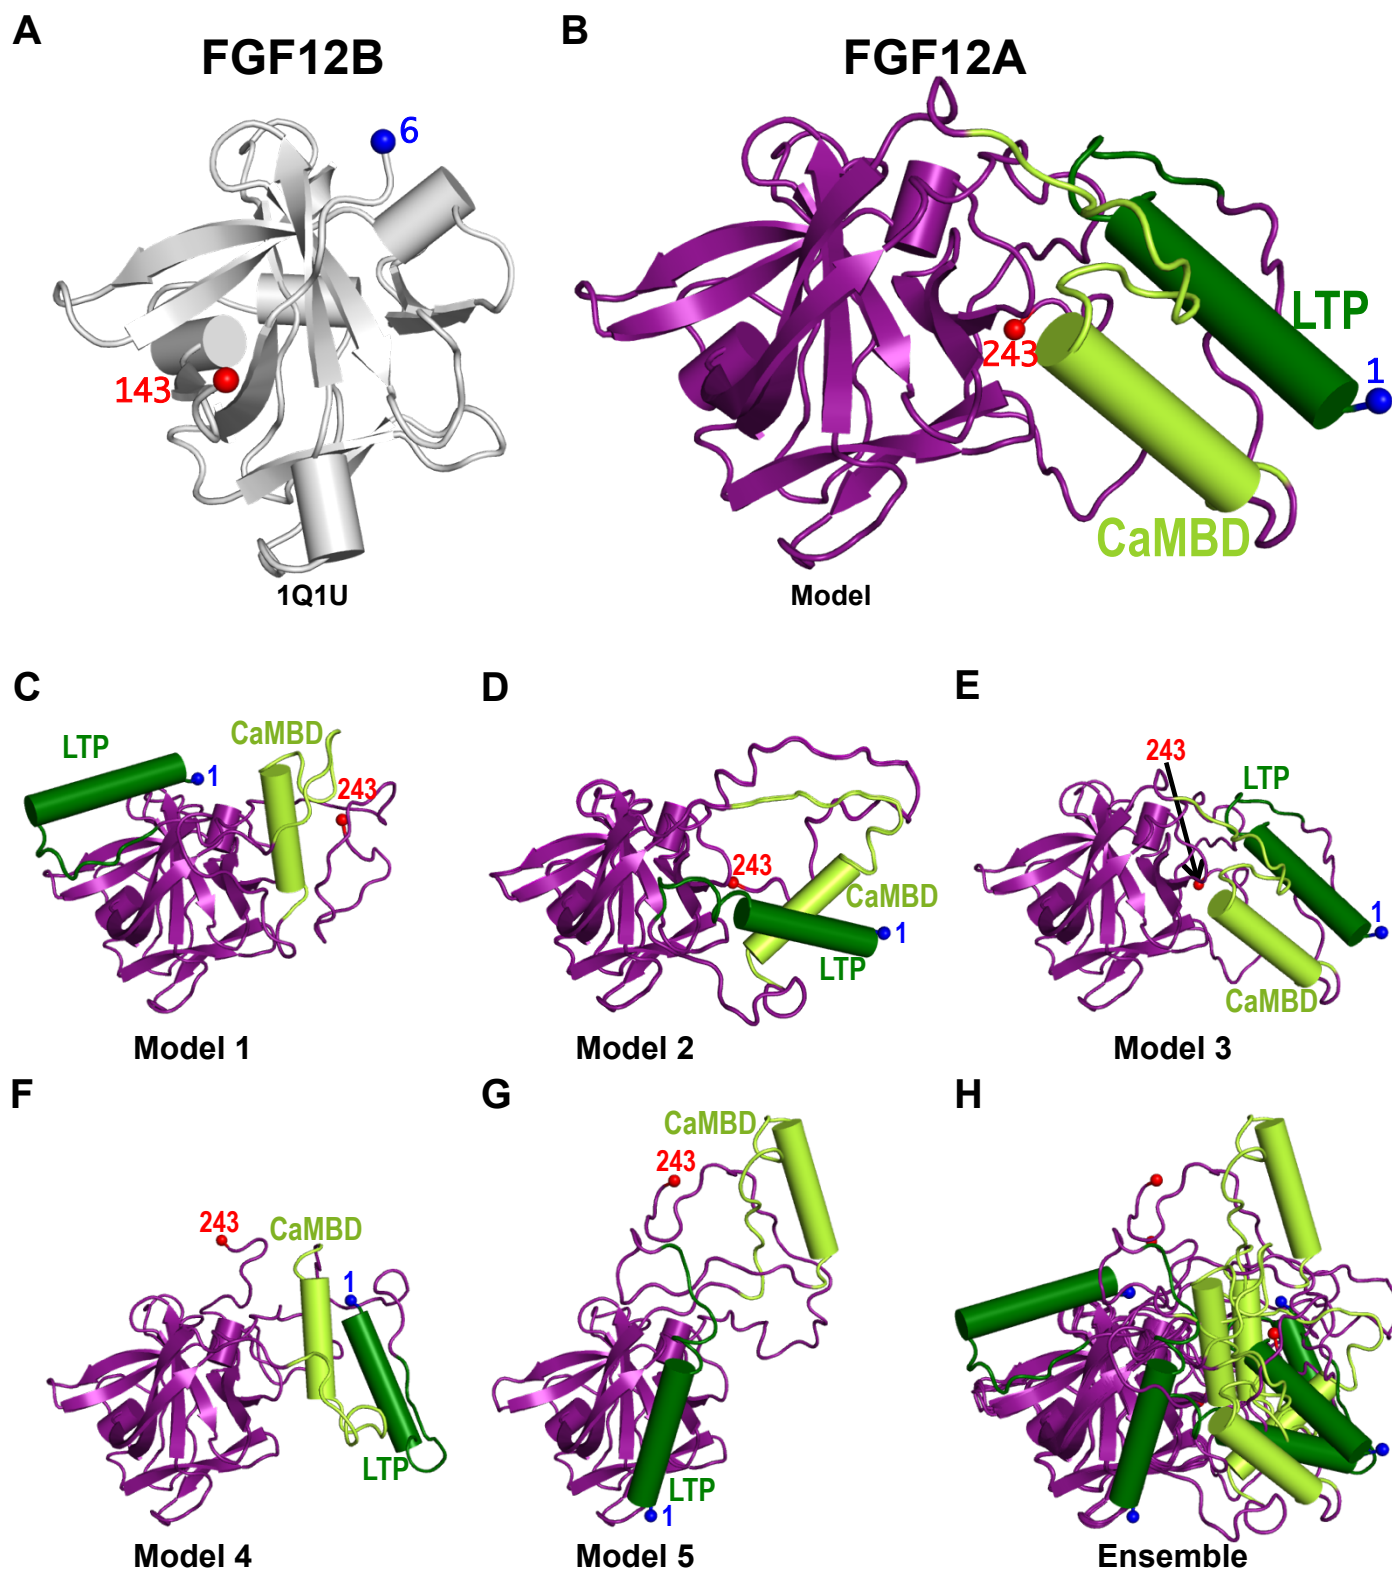

**Figure S3** (Related to Fig. 2) **Ensemble of FGF12A Models**

**A-B:** Alignment of FGF12B (**B**, 1Q1U, gray) and model 3 of FGF12A (**C**, purple, LTP/green, CaMBD/limon). The FGF12A model was aligned with FGF12B a.a. 6-143. C $\alpha$  of FGF12B residues 6 (blue) and 143 (red) and FGF12A residues 1 (blue) and 243 (red) are shown as spheres.

**C-G:** Orientations of the LTP (green) and CaMBD (limon) in the models of FGF12A (purple). C $\alpha$  of FGF12A residues 1 (blue) and 243 (red) are shown as spheres.

**H:** Ensemble of FGF12A aligned with FGF12A (purple) a.a. 69-207. The FGF12A LTP is green and CaMBD is limon. C $\alpha$  of FGF12A residues 1 (blue) and 243 (red) are shown as spheres.

**A**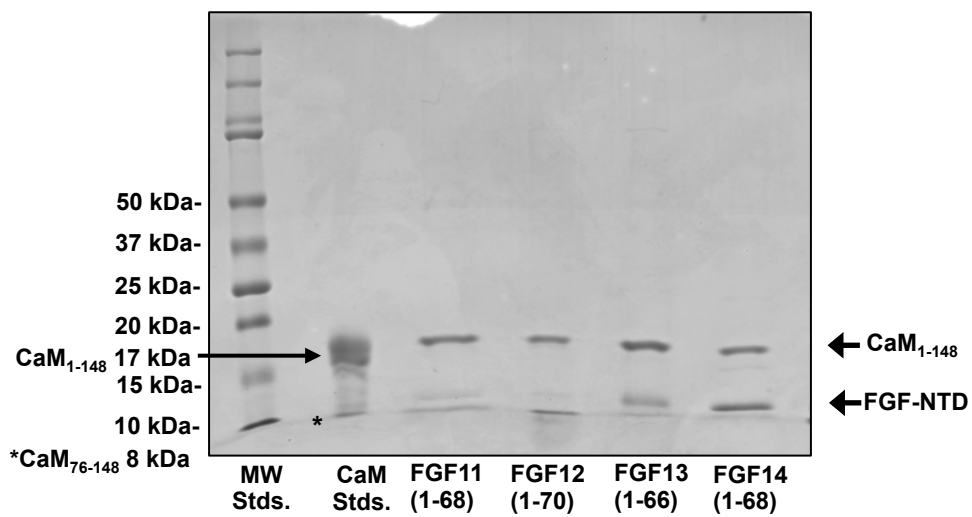**B**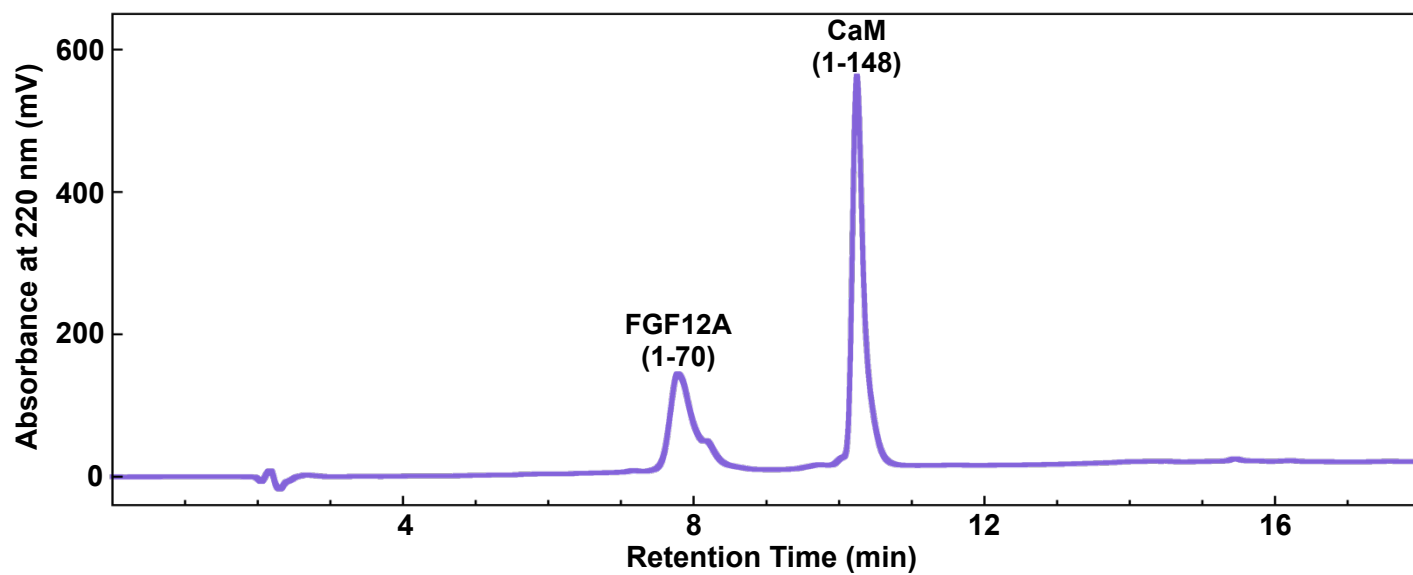**C**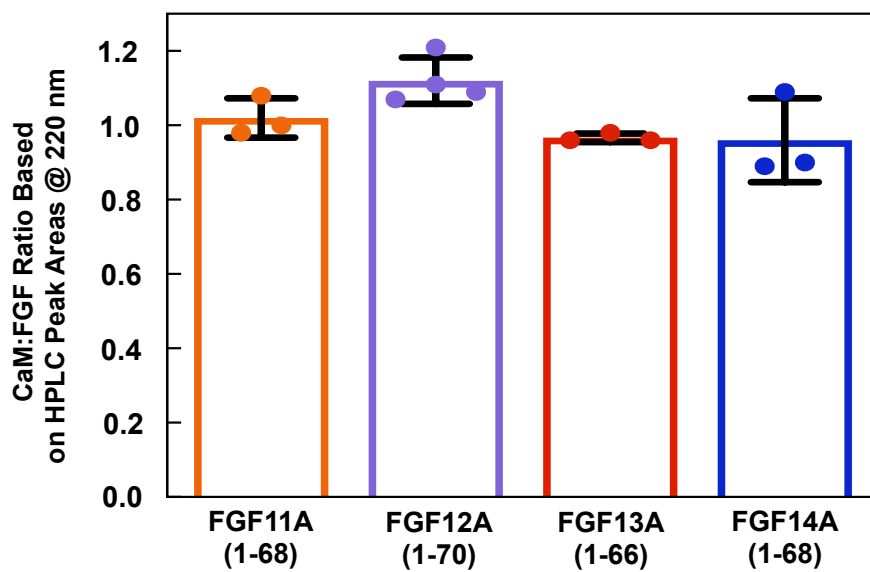

**Figure S4** (Related to Fig. 4) **(Ca<sup>2+</sup>)<sub>4</sub>-CaM Co-Purifies with A-Type FGF NTDs at a 1:1 Ratio**

**A:** 17% SDS-PAGE gel of the (Ca<sup>2+</sup>)<sub>4</sub>-CaM+FGF11A<sub>NTD</sub>, FGF12A<sub>NTD</sub>, FGF13A<sub>NTD</sub>, or FGF14A<sub>NTD</sub> complexes following co-purification.

**B:** rpHPLC chromatogram of the co-purified (Ca<sup>2+</sup>)<sub>4</sub>-CaM+FGF12A<sub>NTD</sub> complex.

**C:** Molar ratio of (Ca<sup>2+</sup>)<sub>4</sub>-CaM to FGF11A<sub>NTD</sub> (orange), FGF12A<sub>NTD</sub> (purple), FGF13A<sub>NTD</sub> (red) or FGF14A<sub>NTD</sub> (blue) in the copurified complexes. The molar ratio was determined by comparing the area of the peak at 220 nm for CaM to that of FGF NTD construct in rpHPLC chromatograms. Error bars show the standard deviation of ≥ 3 experiments.



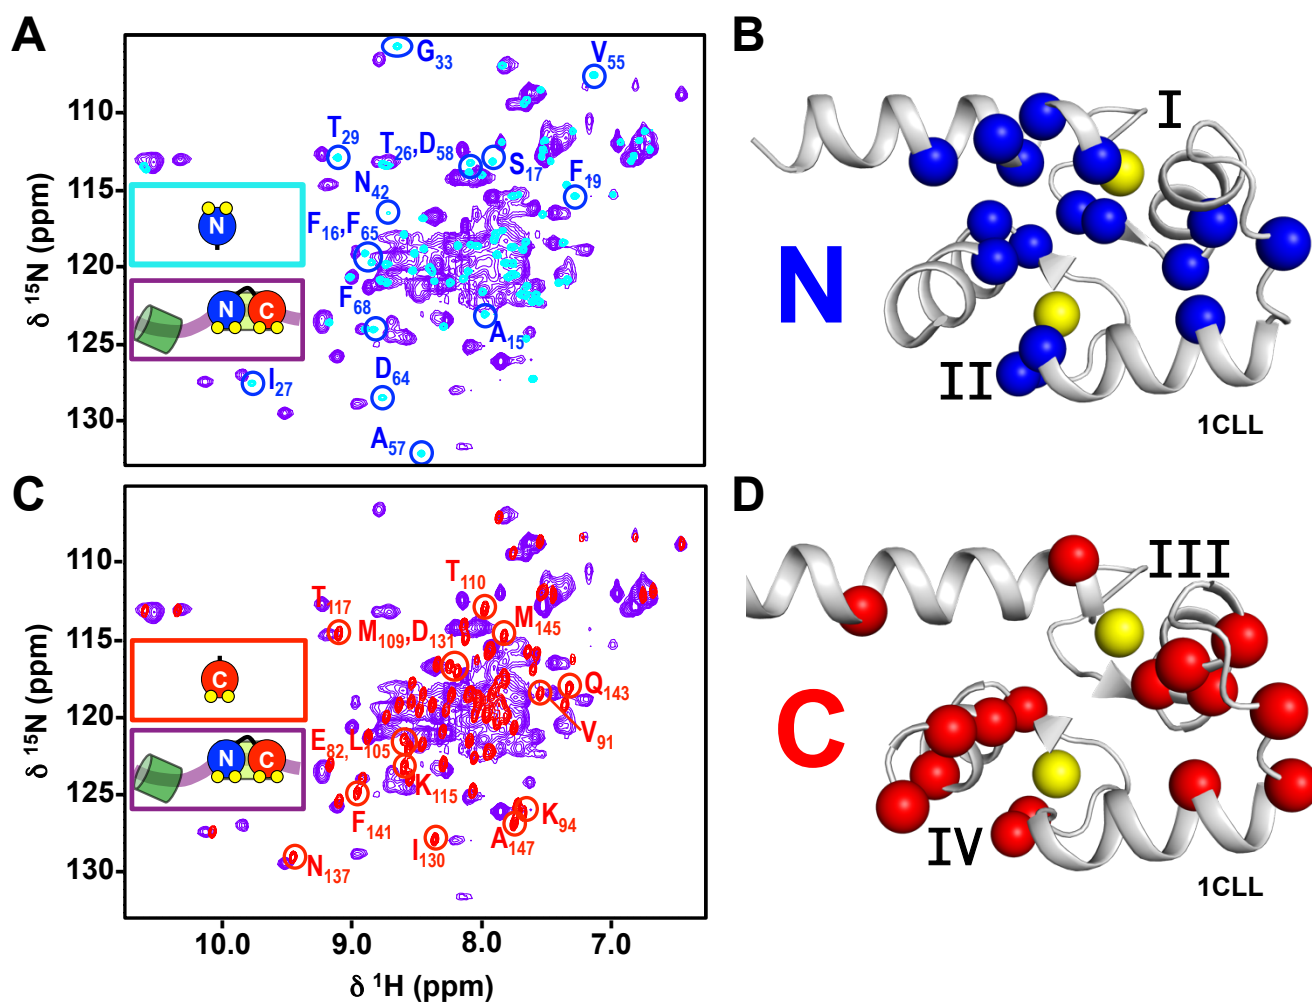

**Figure S5 (Related to Fig. 4) FGF12A<sub>NTD</sub> Binding Perturbs Residues in Both CaM Domains**

**A:** Overlay of the  $^{15}\text{N}$ -HSQC spectra of  $^{15}\text{N}$ - $(\text{Ca}^{2+})_2$ -CaM<sub>N</sub> (blue) and  $^{15}\text{N}$ - $(\text{Ca}^{2+})_4$ -CaM+ $^{14}\text{N}$ -FGF12A<sub>NTD</sub> (purple). Peaks labeled in  $^{15}\text{N}$ - $(\text{Ca}^{2+})_2$ -CaM<sub>N</sub> spectrum are shifted in the  $^{15}\text{N}$ - $(\text{Ca}^{2+})_4$ -CaM+ $^{14}\text{N}$ -FGF12A<sub>NTD</sub> spectrum.

**B:** C $\alpha$  of CaM<sub>N</sub> residues (blue spheres) labeled in panel A on a structure of  $(\text{Ca}^{2+})_4$ -CaM (1CLL, gray helices). For clarity of residues 1-75 of 1CLL are shown.

**C:** Overlay of the  $^{15}\text{N}$ -HSQC spectra of  $^{15}\text{N}$ - $(\text{Ca}^{2+})_2$ -CaM<sub>C</sub> (red) and  $^{15}\text{N}$ - $(\text{Ca}^{2+})_4$ -CaM+ $^{14}\text{N}$ -FGF12A<sub>NTD</sub> (purple). Peaks labeled in  $^{15}\text{N}$ - $(\text{Ca}^{2+})_2$ -CaM<sub>C</sub> spectrum are shifted in the  $^{15}\text{N}$ - $(\text{Ca}^{2+})_4$ -CaM+ $^{14}\text{N}$ -FGF12A<sub>NTD</sub> spectrum.

**D:** C $\alpha$  of CaM<sub>C</sub> residues (red spheres) labeled in panel C on a structure of  $(\text{Ca}^{2+})_4$ -CaM (1CLL, gray helices). For clarity of residues 76-148 of 1CLL are shown.

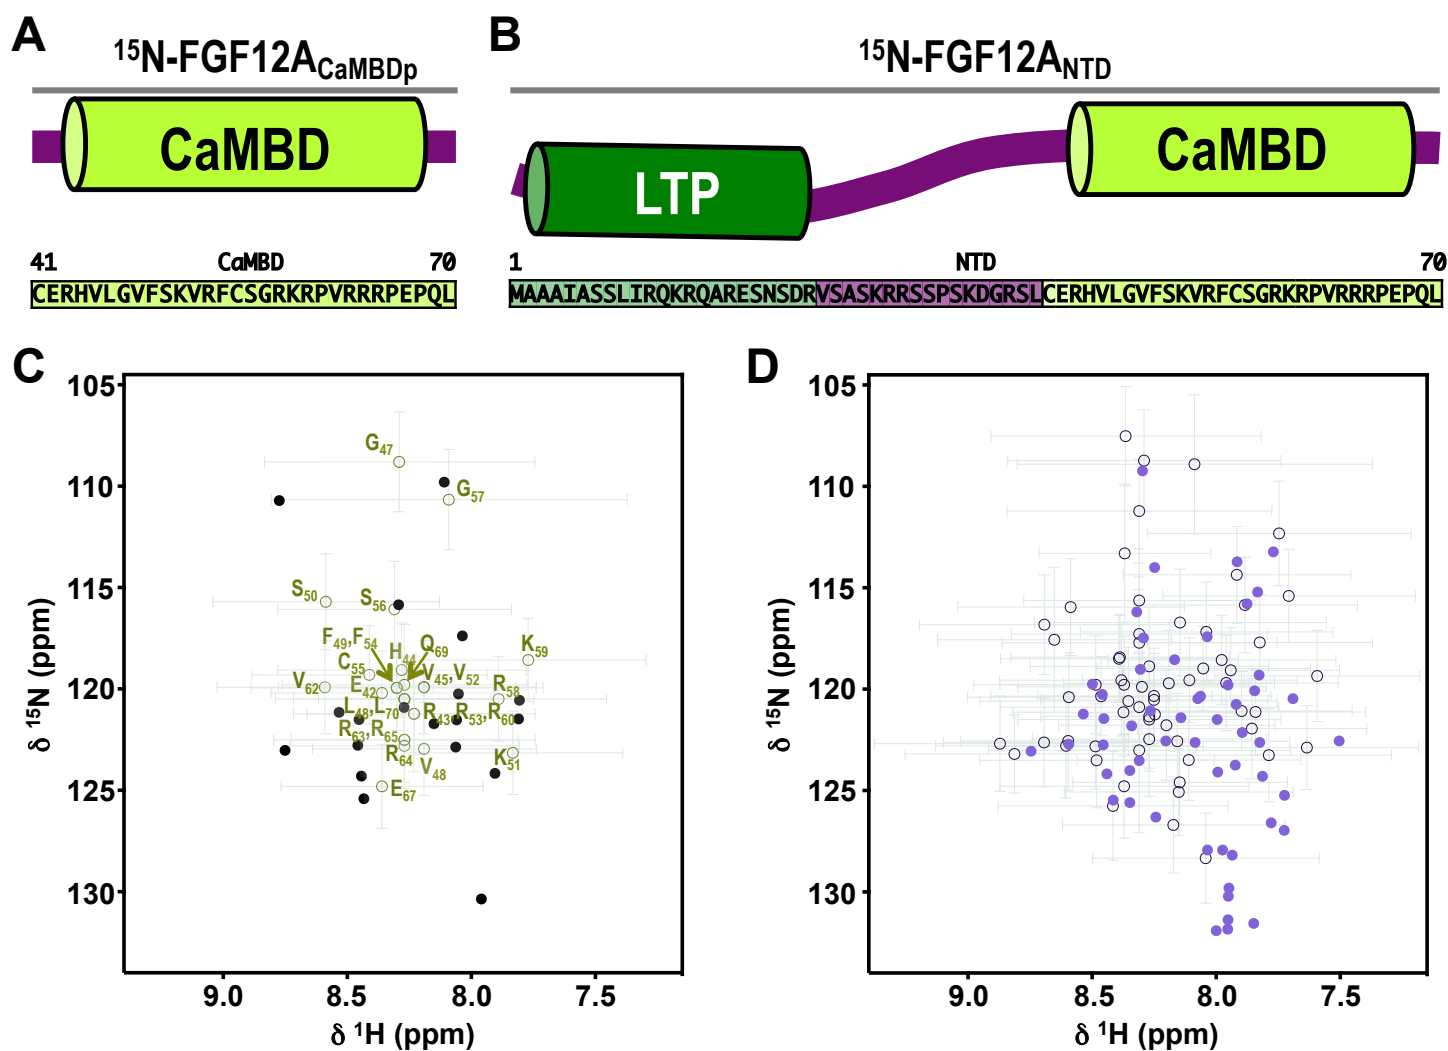

**Figure S6** (Related to Fig. 4)

**Predicted  $^{15}\text{N}$ -HSQC Spectra of  $^{15}\text{N}$ -FGF12A<sub>CaMBDp</sub> and  $^{15}\text{N}$ -FGF12A LTP**

**A-B:** Schematic depictions and sequences of the FGF12A<sub>CaMBDp</sub> (**A**, limon cylinder) and FGF12A<sub>NTD</sub> (**B**, LTP/green cylinder, CaMBD/limon green cylinder). The sequences have been shaded to match the schematics.

**C:** Peaks observed in the  $^{15}\text{N}$ -HSQC spectrum of  $^{15}\text{N}$ -FGF12A<sub>CaMBDp</sub> +  $^{14}\text{N}$ -(Ca<sup>2+</sup>)<sub>4</sub>-CaM (closed, black) are compared to peak positions predicted by SPARTA+ [3] for residues 41 – 70 (FGF12A<sub>CaMBDp</sub>/open, olive) of the energetically most favorable Robetta model (model 1, Fig. 8A) of full-length FGF12A (olive).

**D:** Peaks observed in the  $^{15}\text{N}$ -HSQC spectrum of  $^{15}\text{N}$ -FGF12A<sub>NTD</sub> +  $^{14}\text{N}$ -(Ca<sup>2+</sup>)<sub>4</sub>-CaM (closed, purple) are compared to peak positions predicted by SPARTA+ [55] for residues 1 – 70 (FGF12A<sub>NTD</sub>/open, dark purple) of the energetically most favorable Robetta model (model 1, Fig. 8A) of full-length FGF12A.

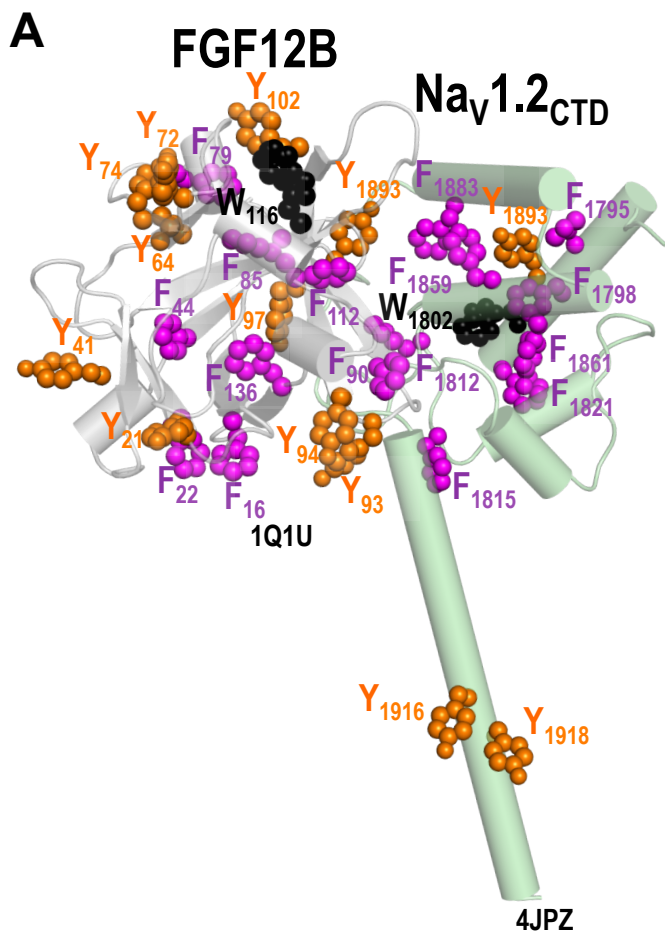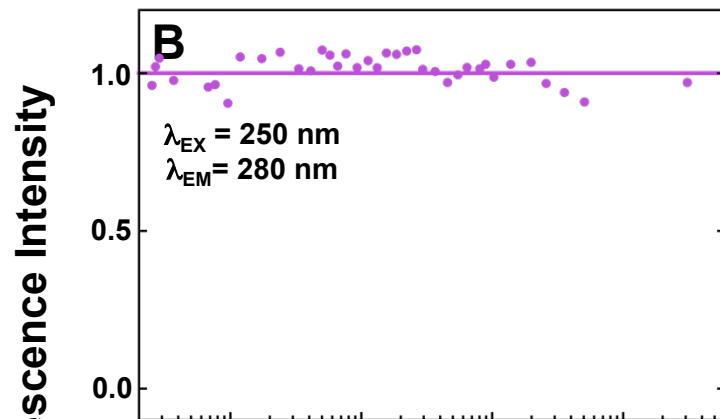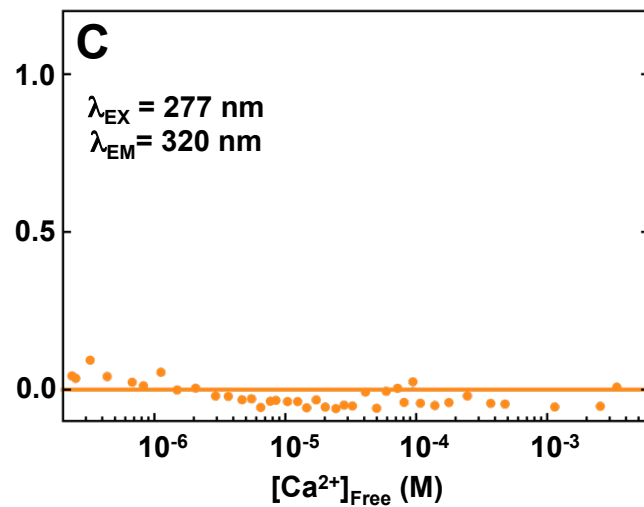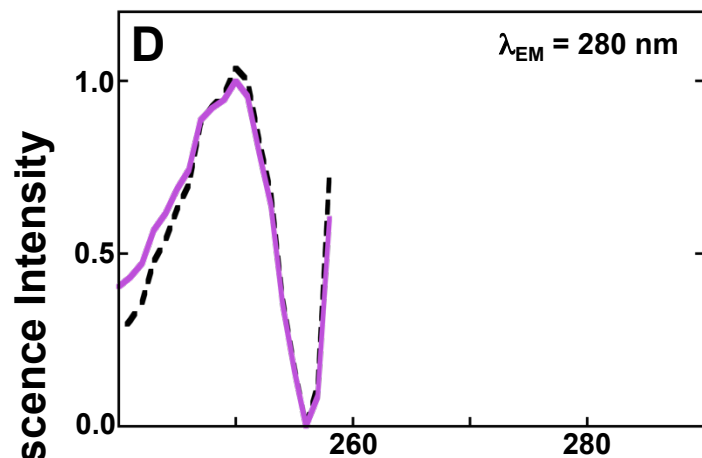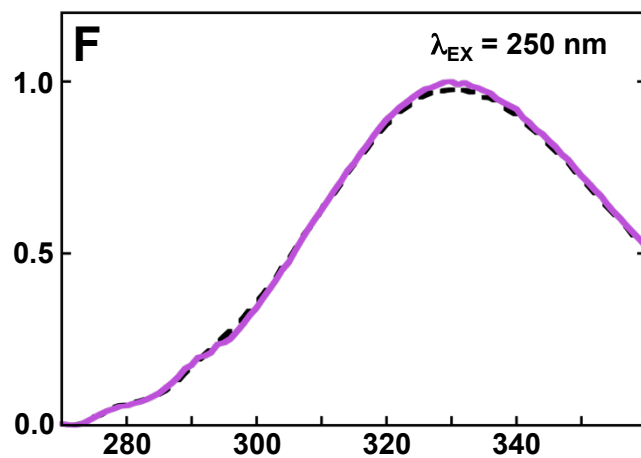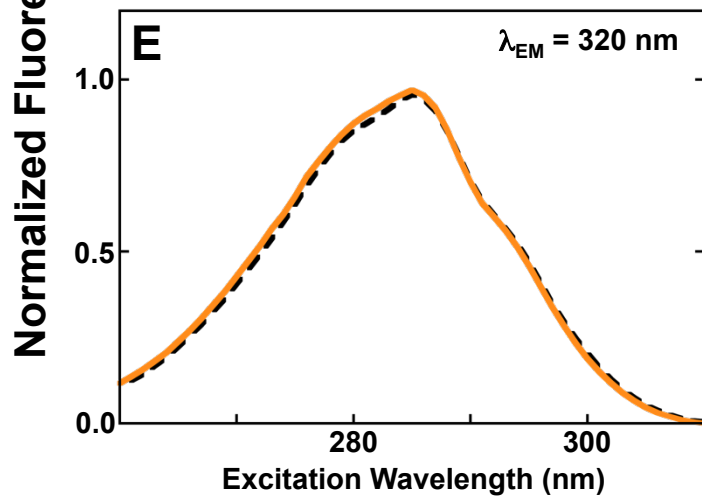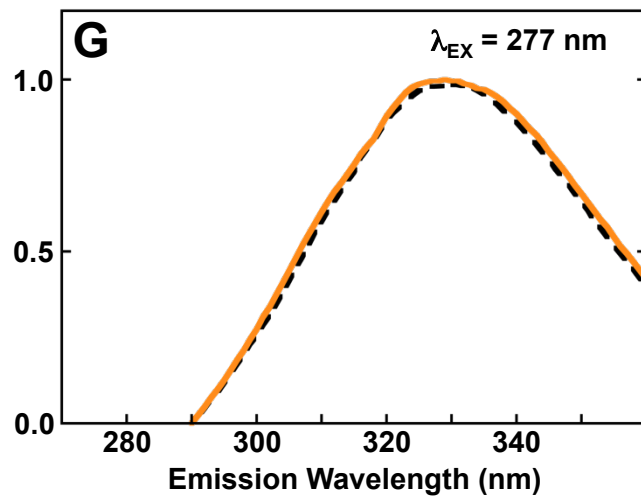

**Figure S7** (Related to Fig. 6)**Equilibrium  $\text{Ca}^{2+}$  Titrations of the FGF12B+Na<sub>v</sub>1.2<sub>CTD</sub> Complex**

**A:** Position of Phe (magenta, ball-and-stick), Tyr (orange, ball-and-stick) and Trp (black, ball-and-stick) residues in a model of FGF12B (1Q1U, gray) bound to Na<sub>v</sub>1.2<sub>CTD</sub> (4JPZ, forest green). The model is a composite of FGF12B from 1Q1U aligned with FGF13U from 4JPZ via FGF13U residues 11-158. FGF13U and CaM in 4JPZ are not shown.

**B-C:** Equilibrium  $\text{Ca}^{2+}$  titrations of the FGF12B+Na<sub>v</sub>1.2<sub>CTD</sub> complex. The average Phe (**B**) or Tyr (**C**) fluorescence intensity of FGF12B+Na<sub>v</sub>1.2<sub>CTD</sub> in each titration was normalized to the average net change in intensity in  $\text{Ca}^{2+}$  titrations of CaM+FGF12B+Na<sub>v</sub>1.2<sub>CTD</sub>. The solid lines at 1 (**B**) and 0 (**C**) are for reference.

**D:** Steady-state excitation spectra ( $\lambda_{\text{EM}} = 280 \text{ nm}$ ) of the FGF12B+Na<sub>v</sub>1.2<sub>CTD</sub> complex in  $\text{Ca}^{2+}$ -depleted conditions (black, dashed) and in the presence of 10 mM  $\text{Ca}^{2+}$  (pink, solid).

**E:** Steady-state excitation spectra ( $\lambda_{\text{EM}} = 320 \text{ nm}$ ) of the FGF12B+Na<sub>v</sub>1.2<sub>CTD</sub> complex in  $\text{Ca}^{2+}$ -depleted conditions (black, dashed) and in the presence of 10 mM  $\text{Ca}^{2+}$  (orange, solid).

**F:** Steady-state emission spectra ( $\lambda_{\text{EX}} = 250 \text{ nm}$ ) of the FGF12B+Na<sub>v</sub>1.2<sub>CTD</sub> complex in  $\text{Ca}^{2+}$ -depleted conditions (black, dashed) and in the presence of 10 mM  $\text{Ca}^{2+}$  (pink, solid).

**G:** Steady-state emission spectra ( $\lambda_{\text{EX}} = 277 \text{ nm}$ ) of the FGF12B+Na<sub>v</sub>1.2<sub>CTD</sub> complex in  $\text{Ca}^{2+}$ -depleted conditions (black, dashed) and in the presence of 10 mM  $\text{Ca}^{2+}$  (orange, solid).

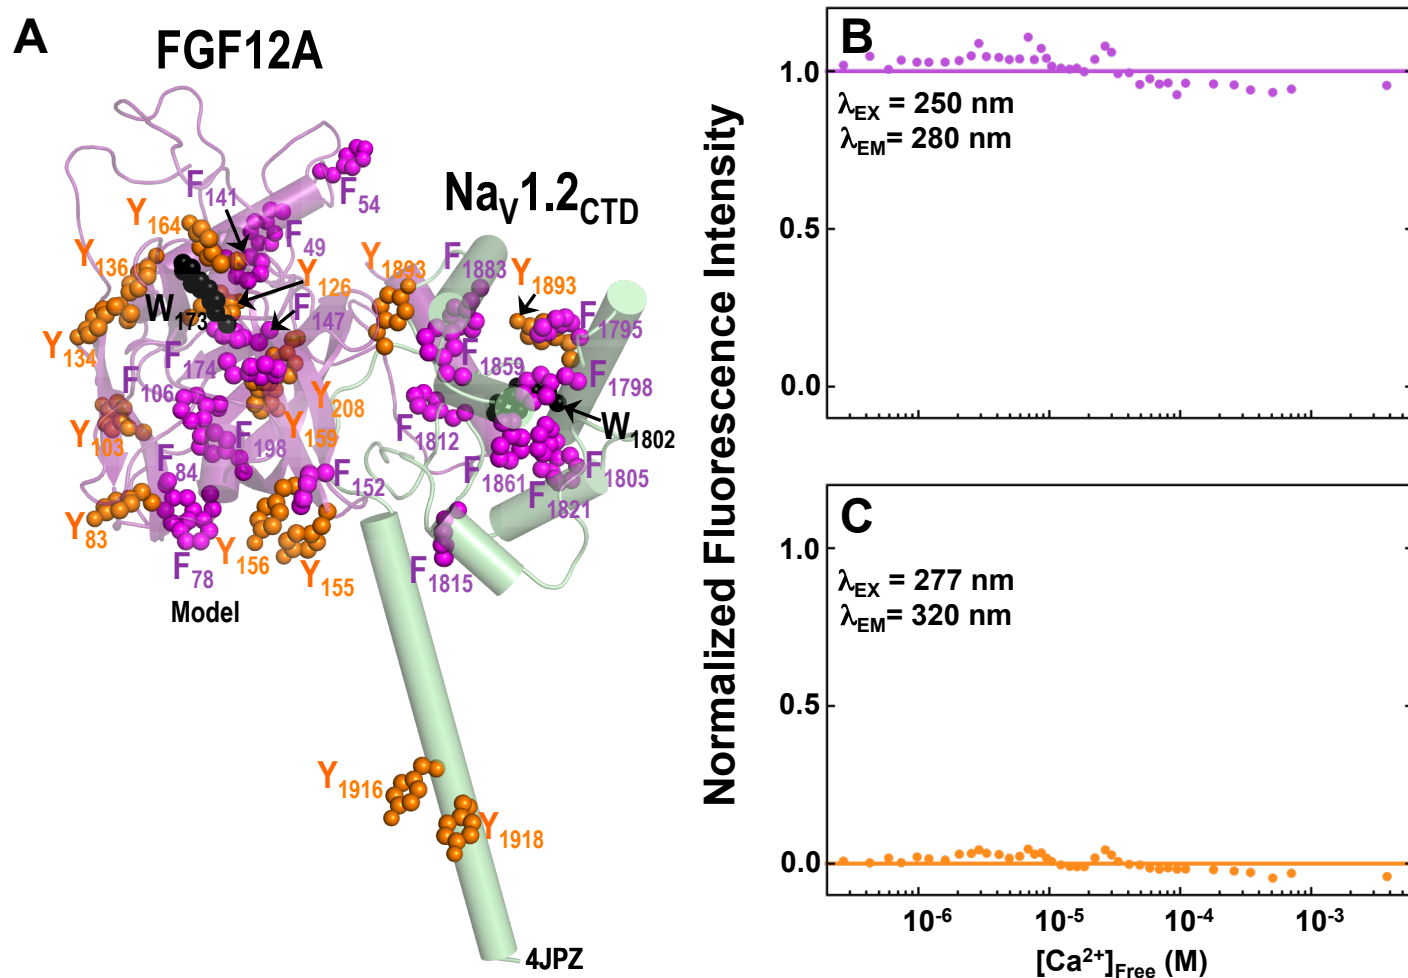

**Figure S8** (Related to Fig. 6)

### Equilibrium $\text{Ca}^{2+}$ Titrations of the FGF12A+Na<sub>v</sub>1.2<sub>CTD</sub> Complex

**A:** Position of Phe (magenta, ball-and-stick), Tyr (orange, ball-and-sticks), and Trp (black, ball-and-stick) residues in a model of FGF12A (model, purple) bound to Na<sub>v</sub>1.2<sub>CTD</sub> (4JPZ, forest green). The model is a composite of the FGF12A aligned with FGF13U from 4JPZ via FGF13U residues 11-158. FGF13U and CaM in 4JPZ are not shown.

**B-C:** Equilibrium  $\text{Ca}^{2+}$  titrations of the FGF12A+Na<sub>v</sub>1.2<sub>CTD</sub> complex. The average Phe (**B**) or Tyr (**C**) fluorescence intensity of FGF12A+Na<sub>v</sub>1.2<sub>CTD</sub> in each titration was normalized to the average net change in intensity in  $\text{Ca}^{2+}$  titrations of CaM+FGF12A+Na<sub>v</sub>1.2<sub>CTD</sub>. The solid lines at 1 (**B**) and 0 (**C**) are for reference.

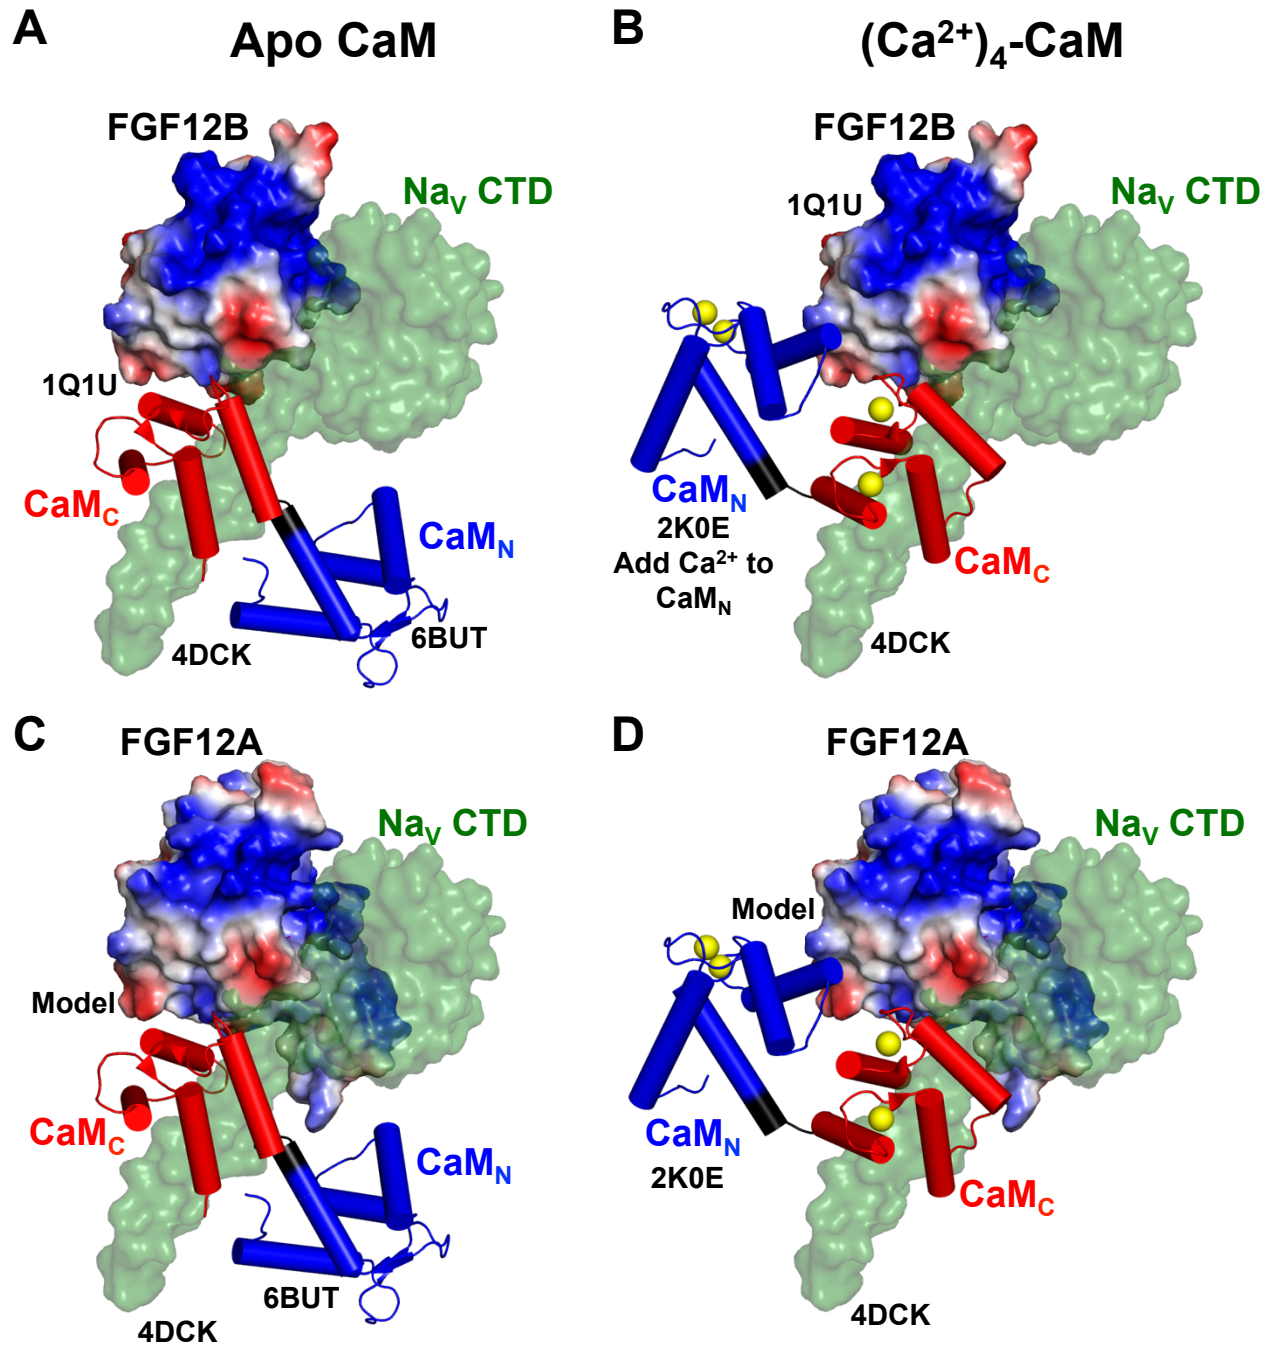

**Figure S9 (Related to Fig. 9)**  
**Models of CaM and FGF12B or FGF12A Bound to an Na<sub>v</sub> CTD**

In all models the Na<sub>v</sub> CTD (4DCK) is shown as a transparent surface (green), FGF12B (1Q1U) and FGF12A are shown as a vacuum electrostatic surface (basic/blue, acidic/red, neutral/white), CaM residues 1-75 are blue, 76-80 are black, and 81-148 are red. Ca<sup>2+</sup> are shown as yellow spheres where appropriate.

**A:** Model of apo CaM and FGF12B bound to an Na<sub>v</sub> CTD. Model was generated by aligning the solution structure of apo CaM+Na<sub>v</sub>1.2<sub>IQp</sub> (6BUT) to the crystallographic structure of apo CaM+FGF13B+Na<sub>v</sub>1.5 CTD (4DCK) with CaM residues 101-112 and 117-128. The crystallographic structure of FGF12B (1Q1U) was docked using FGF13U residues 11–136.

**B:** Model of (Ca<sup>2+</sup>)<sub>4</sub>-CaM and FGF12B bound to an Na<sub>v</sub> CTD. Model was generated by docking the structure of (Ca<sup>2+</sup>)<sub>2</sub>-CaM<sub>C</sub>+Na<sub>v</sub>1.2 IQ motif (2M5E) with the Na<sub>v</sub>1.5 IQ motif in the crystallographic structure of apo CaM+FGF13U+Na<sub>v</sub>1.5 CTD (4DCK) via Na<sub>v</sub>1.2 IQ motif residues 1904-1924. A solution structure of (Ca<sup>2+</sup>)<sub>4</sub>-CaM (2K0E) was docked via CaM residues 101-112 and 117-128 of 2M5E. FGF12B (1Q1U) was docked through residues 11–136 of FGF13U.

**C:** Model of apo CaM and FGF12A bound to an Na<sub>v</sub> CTD. Model was generated by aligning the solution structure of apo CaM+Na<sub>v</sub>1.2<sub>IQp</sub> (6BUT) to the crystallographic structure of apo CaM+FGF13U+Na<sub>v</sub>1.5 CTD (4DCK) with CaM residues 101-112 and 117-128. The modeled structure of FGF12A was docked using FGF13U residues 11–136.

**D:** Model of (Ca<sup>2+</sup>)<sub>4</sub>-CaM and FGF12A bound to an Na<sub>v</sub> CTD. Model was generated by docking the structure of (Ca<sup>2+</sup>)<sub>2</sub>-CaM<sub>C</sub>+Na<sub>v</sub>1.2 IQ motif (2M5E) with the Na<sub>v</sub>1.5 IQ motif in the crystallographic structure of apo CaM+FGF13U+Na<sub>v</sub>1.5 CTD (4DCK) via Na<sub>v</sub>1.2 IQ motif residues 1904-1924. A solution structure of (Ca<sup>2+</sup>)<sub>4</sub>-CaM (2K0E) was docked via CaM residues 101-112 and 117-128 of 2M5E. The model structure of FGF12A was docked through residues 11–136 of FGF13U. For clarity, ribbon drawings of CaM and FGF13U of 4DCK, CaM and Na<sub>v</sub>1.2 IQ motif of 2M5E and Na<sub>v</sub>1.2 IQ motif of 6BUT are not shown.

## Table S1

(Related to Fig. 2)

### Comparison of FGF11A LTP Sequences From 60 Species

**LTP Sequence Table (Completely Conserved Positions Highlighted in Yellow, Positions Conserved in ≥ 90% of Species Highlighted in Green)**

| Species | Common Name                 | Start Residue                 | Amino Acid Sequence |   |   |   |   |   |   |   |   |    |    |    |    |    |    |    |    |    |    |    |    |    |    | End Residue |
|---------|-----------------------------|-------------------------------|---------------------|---|---|---|---|---|---|---|---|----|----|----|----|----|----|----|----|----|----|----|----|----|----|-------------|
|         |                             |                               | 1                   | 2 | 3 | 4 | 5 | 6 | 7 | 8 | 9 | 10 | 11 | 12 | 13 | 14 | 15 | 16 | 17 | 18 | 19 | 20 | 21 | 22 | 23 |             |
| 1       | Homo sapiens                | Human                         | M                   | A | A | L | A | S | S | L | I | R  | Q  | K  | R  | E  | V  | R  | E  | P  | G  | G  | S  | R  | P  | 23          |
| 2       | Danio rerio                 | Zebrafish                     | M                   | A | A | L | A | S | S | L | I | R  | Q  | R  | R  | E  | V  | K  | D  | P  | K  | A  | N  | R  | Q  | 23          |
| 3       | Pangasianodon hypophthalmus | Iridescent shark              | M                   | A | A | L | A | S | S | L | I | R  | Q  | R  | R  | E  | V  | K  | D  | Q  | Q  | A  | N  | R  | Q  | 23          |
| 4       | Anarrhichthys ocellatus     | Wolf eel                      | M                   | A | A | L | A | S | S | L | I | R  | Q  | R  | R  | E  | V  | K  | D  | P  | Q  | A  | N  | R  | Q  | 23          |
| 5       | Myripristis murdjan         | Soldierfish                   | M                   | A | A | L | A | S | S | L | I | R  | Q  | R  | R  | E  | V  | K  | D  | P  | Q  | A  | N  | R  | Q  | 23          |
| 6       | Hippoglossus hippoglossus   | Righteye Founder              | M                   | A | A | L | A | S | S | L | I | R  | Q  | R  | R  | E  | V  | K  | D  | P  | Q  | A  | N  | R  | Q  | 23          |
| 7       | Oreochromis aureus          | Blue Tilapia                  | M                   | A | A | L | A | S | S | L | I | R  | Q  | R  | R  | E  | V  | K  | D  | P  | Q  | A  | N  | R  | Q  | 23          |
| 8       | Denticeps clupeioides       | Denticle Herring              | M                   | A | A | L | A | S | S | L | I | R  | Q  | R  | R  | E  | V  | K  | D  | P  | Q  | A  | N  | R  | Q  | 23          |
| 9       | Astyanax mexicanus          | Mexican Tetra                 | M                   | A | A | L | A | S | S | L | I | R  | Q  | R  | R  | E  | V  | K  | D  | P  | Q  | A  | N  | R  | Q  | 23          |
| 10      | Cyprinus carpio             | Carp                          | M                   | A | A | L | A | S | S | L | I | R  | Q  | R  | R  | E  | V  | K  | D  | P  | Q  | A  | N  | R  | Q  | 23          |
| 11      | Clupea harengus             | Atlantic Herring              | M                   | A | A | L | A | S | S | L | I | R  | Q  | R  | R  | E  | I  | K  | D  | P  | Q  | A  | N  | R  | Q  | 23          |
| 12      | Scophthalmus maximus        | Turbot                        | M                   | A | A | L | A | S | S | L | I | R  | Q  | R  | R  | E  | V  | K  | D  | P  | Q  | A  | N  | R  | Q  | 23          |
| 13      | Microcebus murinus          | Gray Mouse Lemur              | M                   | A | A | L | A | S | S | L | I | R  | Q  | K  | R  | E  | V  | R  | E  | P  | G  | G  | S  | R  | P  | 23          |
| 14      | Vicugna pacos               | Alpaca                        | M                   | A | A | L | A | S | S | L | I | R  | Q  | K  | R  | E  | V  | R  | E  | P  | G  | G  | S  | R  | P  | 23          |
| 15      | Macaca mulatta              | Rhesus Maceque                | M                   | A | A | L | A | S | S | L | I | R  | Q  | K  | R  | E  | V  | R  | E  | P  | G  | G  | S  | R  | P  | 23          |
| 16      | Papio anubis                | Olive Baboon                  | M                   | A | A | L | A | S | S | L | I | R  | Q  | K  | R  | E  | V  | R  | E  | P  | G  | G  | S  | R  | P  | 23          |
| 17      | Trachypithecus francoisi    | Tonkin leaf monkey            | M                   | A | A | L | A | S | S | L | I | R  | Q  | K  | R  | E  | V  | R  | E  | P  | G  | G  | S  | R  | P  | 23          |
| 18      | Castor canadensis           | North American Beaver         | M                   | A | A | L | A | S | S | L | I | R  | Q  | K  | R  | E  | V  | R  | E  | P  | G  | G  | S  | R  | P  | 23          |
| 19      | Rhinopithecus roxellana     | Golden snub-nosed monkey      | M                   | A | A | L | A | S | S | L | I | R  | Q  | K  | R  | E  | V  | R  | E  | P  | G  | G  | S  | R  | P  | 23          |
| 20      | Tupaia chinensis            | Treeshrew                     | M                   | A | A | L | A | S | S | L | I | R  | Q  | K  | R  | E  | V  | R  | E  | P  | G  | G  | S  | R  | P  | 23          |
| 21      | Carlito syrichta            | Philippine Tarsier            | M                   | A | A | L | A | S | S | L | I | R  | Q  | K  | R  | E  | V  | R  | E  | P  | G  | G  | S  | R  | P  | 23          |
| 22      | Canis lupus familiaris      | Dog                           | M                   | A | A | L | A | S | S | L | I | R  | Q  | K  | R  | E  | V  | R  | E  | P  | G  | G  | S  | R  | P  | 23          |
| 23      | Crocuta crocuta             | Spotted Hyena                 | M                   | A | A | L | A | S | S | L | I | R  | Q  | K  | R  | E  | V  | R  | E  | P  | G  | G  | S  | R  | P  | 23          |
| 24      | Canis lupus dingo           | Dingo                         | M                   | A | A | L | A | S | S | L | I | R  | Q  | K  | R  | E  | V  | R  | E  | P  | G  | G  | S  | R  | P  | 23          |
| 25      | Sapajus apella              | Tuffed Capuchin               | M                   | A | A | L | A | S | S | L | I | R  | Q  | K  | R  | E  | V  | R  | E  | P  | G  | G  | N  | R  | P  | 23          |
| 26      | Aotus nancymaae             | Night Monkey                  | M                   | A | A | L | A | S | S | L | I | R  | Q  | K  | R  | E  | V  | R  | E  | P  | G  | G  | N  | R  | P  | 23          |
| 27      | Felis catus                 | Cat                           | M                   | A | A | L | A | S | S | L | I | R  | Q  | K  | R  | E  | V  | R  | E  | P  | G  | G  | N  | R  | P  | 23          |
| 28      | Zalophus californianus      | California Sea Lion           | M                   | A | A | L | A | S | S | L | I | R  | Q  | K  | R  | E  | V  | R  | E  | P  | G  | G  | S  | R  | P  | 23          |
| 29      | Nomascus leucogenys         | Northern White-Cheeked Gibbon | M                   | A | A | L | A | S | S | L | I | R  | Q  | K  | R  | E  | V  | R  | E  | P  | G  | G  | S  | R  | P  | 23          |
| 30      | Callorhinus ursinus         | Northern Fur Seal             | M                   | A | A | L | A | S | S | L | I | R  | Q  | K  | R  | E  | V  | R  | E  | P  | G  | G  | S  | R  | P  | 23          |
| 31      | Otolemur garnettii          | Northern Greater Galago       | M                   | A | A | L | A | S | S | L | I | R  | Q  | K  | R  | E  | V  | R  | E  | P  | G  | G  | S  | R  | P  | 23          |
| 32      | Pteropus alecto             | Black Flying Fox              | M                   | A | A | L | A | S | S | L | I | R  | Q  | K  | R  | E  | V  | R  | E  | P  | G  | G  | S  | R  | P  | 23          |
| 33      | Suricata suricatta          | Meerkat                       | M                   | A | A | L | A | S | S | L | I | R  | Q  | K  | R  | E  | V  | R  | E  | P  | G  | G  | S  | R  | P  | 23          |
| 34      | Dasylops novemcinctus       | None-banded Armadillo         | M                   | A | A | L | A | S | S | L | I | R  | Q  | K  | R  | E  | V  | R  | E  | P  | G  | G  | S  | R  | P  | 23          |
| 35      | Bos taurus                  | Cattle                        | M                   | A | A | L | A | S | S | L | I | R  | Q  | K  | R  | E  | V  | R  | E  | P  | G  | G  | S  | R  | P  | 23          |
| 36      | Phyllostomus discolor       | Pale Spear-nosed Bat          | M                   | A | A | L | A | S | S | L | I | R  | Q  | K  | R  | E  | V  | R  | E  | P  | G  | G  | S  | R  | P  | 23          |
| 37      | Hylobates moloch            | Silvery Gibbon                | M                   | A | A | L | A | S | S | L | I | R  | Q  | K  | R  | E  | V  | R  | E  | P  | G  | G  | S  | R  | P  | 23          |
| 38      | Pongo abelii                | Sumatran Orangutan            | M                   | A | A | L | A | S | S | L | I | R  | Q  | K  | R  | E  | V  | R  | E  | P  | G  | G  | S  | R  | P  | 23          |
| 39      | Heterocephalus glaber       | Naked mole-rat                | M                   | A | A | L | A | S | S | L | I | R  | Q  | K  | R  | E  | V  | R  | E  | P  | G  | G  | S  | R  | P  | 23          |
| 40      | Equus caballus              | Horse                         | M                   | A | A | L | A | S | S | L | I | R  | Q  | K  | R  | E  | V  | R  | E  | P  | G  | G  | S  | R  | P  | 23          |
| 41      | Ovis aries                  | Sheep                         | M                   | A | A | L | A | S | S | L | I | R  | Q  | K  | R  | E  | V  | R  | E  | P  | G  | G  | S  | R  | P  | 23          |
| 42      | Eptesicus fuscus            | Big Brown Bat                 | M                   | A | A | L | A | S | S | L | I | R  | Q  | K  | R  | E  | V  | R  | E  | P  | G  | G  | S  | R  | P  | 23          |
| 43      | Leptonychotes weddellii     | Weddell Seal                  | M                   | A | A | L | A | S | S | L | I | R  | Q  | K  | R  | E  | V  | R  | E  | P  | G  | G  | S  | R  | P  | 23          |
| 44      | Octodon degus               | Common Degu                   | M                   | A | A | L | A | S | S | L | I | R  | Q  | K  | R  | E  | V  | R  | E  | P  | G  | G  | S  | R  | P  | 23          |
| 45      | Gorilla gorilla gorilla     | Gorilla                       | M                   | A | A | L | A | S | S | L | I | R  | Q  | K  | R  | E  | V  | R  | E  | P  | G  | G  | S  | R  | P  | 23          |
| 46      | Cavia porcellus             | Guinea Pig                    | M                   | A | A | L | A | S | S | L | I | R  | Q  | K  | R  | E  | V  | R  | E  | P  | G  | G  | S  | R  | P  | 23          |
| 47      | Callithrix jacchus          | Common Marmoset               | M                   | A | A | L | A | S | S | L | I | R  | Q  | K  | R  | E  | V  | R  | E  | P  | G  | G  | N  | R  | P  | 23          |
| 48      | Mus pahari                  | Gairdner's Shrewmouse         | M                   | A | A | L | A | S | S | L | I | R  | Q  | K  | R  | E  | V  | R  | E  | P  | G  | G  | S  | R  | P  | 23          |
| 49      | Mirounga leonina            | Southern Elephant Seal        | M                   | A | A | L | A | S | S | L | I | R  | Q  | K  | R  | E  | V  | R  | E  | P  | G  | G  | S  | R  | P  | 23          |
| 50      | Mus musculus                | House Mouse                   | M                   | A | A | L | A | S | S | L | I | R  | Q  | K  | R  | E  | V  | R  | E  | P  | G  | G  | S  | R  | P  | 23          |
| 51      | Ailuropoda melanoleuca      | Giant Panda                   | M                   | A | A | L | A | S | S | L | I | R  | Q  | K  | R  | E  | V  | R  | E  | P  | G  | G  | S  | R  | P  | 23          |
| 52      | Grammomys surdaster         | African Tree Rat              | M                   | A | A | L | A | S | S | L | I | R  | Q  | K  | R  | E  | V  | R  | E  | P  | G  | G  | S  | R  | P  | 23          |
| 53      | Ursus arctos horribilis     | Grizzly Bear                  | M                   | A | A | L | A | S | S | L | I | R  | Q  | K  | R  | E  | V  | R  | E  | P  | G  | G  | S  | R  | P  | 23          |
| 54      | Nannospalax galili          | Blind Mole-rat                | M                   | A | A | L | A | S | S | L | I | R  | Q  | K  | R  | E  | V  | R  | E  | P  | G  | G  | S  | R  | P  | 23          |
| 55      | Rattus norvegicus           | Brown Rat                     | M                   | A | A | L | A | S | S | L | I | R  | Q  | K  | R  | E  | V  | R  | E  | P  | G  | G  | S  | R  | P  | 23          |
| 56      | Desmodus rotundus           | Vampire Bat                   | M                   | A | A | L | A | S | S | L | I | R  | Q  | K  | R  | E  | V  | R  | E  | P  | G  | G  | S  | R  | P  | 23          |
| 57      | Meriones unguiculatus       | Mongolian Gerbil              | M                   | A | A | L | A | S | S | L | I | R  | Q  | K  | R  | E  | V  | R  | E  | P  | G  | G  | S  | R  | P  | 23          |
| 58      | Mus caroli                  | Ryukyu Mouse                  | M                   | A | A | L | A | S | S | L | I | R  | Q  | K  | R  | E  | V  | R  | E  | P  | G  | G  | S  | R  | P  | 23          |
| 59      | Urocitellus parryii         | Arctic Ground Squirrel        | M                   | A | A | L | A | S | S | L | I | R  | Q  | K  | R  | E  | V  | R  | E  | P  | G  | G  | S  | R  | P  | 23          |
| 60      | Lontra canadensis           | North American River Otter    | M                   | A | A | L | A | S | S | L | I | R  | Q  | K  | R  | E  | V  | R  | E  | P  | G  | G  | S  | R  | P  | 23          |



**Table S2**  
(Related to Fig. 2)  
**Comparison of FGF12A LTP Sequences From 56 Species**

LTP Sequence Table (Completely Conserved Positions Highlighted in Yellow, Positions Conserved in ≥ 90% of Species Highlighted in Green)

| Species | Common Name                    | Start Residue                    | LTP Sequence Table |   |   |   |   |   |   |   |   |    |    |    |    |    |    |    |    |    |    |    | End Residue |    |    |    |    |
|---------|--------------------------------|----------------------------------|--------------------|---|---|---|---|---|---|---|---|----|----|----|----|----|----|----|----|----|----|----|-------------|----|----|----|----|
|         |                                |                                  | 1                  | 2 | 3 | 4 | 5 | 6 | 7 | 8 | 9 | 10 | 11 | 12 | 13 | 14 | 15 | 16 | 17 | 18 | 19 | 20 |             | 21 | 22 | 23 |    |
| 1       | Homo sapiens                   | Human                            | M                  | A | A | A | I | A | S | S | L | I  | R  | Q  | K  | R  | Q  | A  | R  | E  | S  | N  | S           | D  | R  | 23 |    |
| 2       | Danio rerio                    | Zebrafish                        | 1                  | M | - | A | A | I | A | S | S | L  | I  | R  | Q  | K  | R  | Q  | A  | R  | E  | S  | N           | S  | D  | R  | 22 |
| 3       | Apteryx rowi                   | Kiwi                             | 1                  | M | A | A | A | I | A | S | S | L  | I  | R  | Q  | K  | R  | Q  | A  | R  | E  | S  | N           | S  | D  | R  | 23 |
| 4       | Castor canadensis              | North American Beaver            | 1                  | M | A | A | A | I | A | S | S | L  | I  | R  | Q  | K  | R  | Q  | A  | R  | E  | S  | N           | S  | D  | R  | 23 |
| 5       | Cavia porcellus                | Guinea Pig                       | 1                  | M | A | A | A | I | A | S | S | L  | I  | R  | Q  | K  | R  | Q  | A  | R  | E  | S  | N           | S  | D  | R  | 23 |
| 6       | Cricetulus griseus             | Chinese Hamster                  | 1                  | M | A | A | A | I | A | S | S | L  | I  | R  | Q  | K  | R  | Q  | A  | R  | E  | S  | N           | S  | D  | R  | 23 |
| 7       | Cyprinus carpio                | Common Carp                      | 1                  | M | - | A | A | I | A | S | S | L  | I  | R  | Q  | K  | R  | Q  | A  | R  | E  | S  | N           | S  | D  | R  | 22 |
| 8       | Fukomys damarensis             | Damaraland Mole-Rat              | 1                  | M | A | A | A | I | A | S | S | L  | I  | R  | Q  | K  | R  | Q  | A  | R  | E  | S  | N           | S  | D  | R  | 23 |
| 9       | Gallus gallus                  | Red Junglefowl                   | 1                  | M | A | A | A | I | A | S | S | L  | I  | R  | Q  | K  | R  | Q  | A  | R  | E  | S  | N           | S  | D  | R  | 23 |
| 10      | Lynx pardinus                  | Iberian Lynx                     | 1                  | M | A | A | A | I | A | S | S | L  | I  | R  | Q  | K  | R  | Q  | A  | R  | E  | S  | N           | S  | D  | R  | 23 |
| 11      | Macaca mulatta                 | Rhesus Macaque                   | 1                  | M | A | A | A | I | A | S | S | L  | I  | R  | Q  | K  | R  | Q  | A  | R  | E  | S  | N           | S  | D  | R  | 23 |
| 12      | Mirounga leonina               | Southern Elephant Seal           | 1                  | M | A | A | A | I | A | S | S | L  | I  | R  | Q  | K  | R  | Q  | A  | R  | E  | S  | N           | S  | D  | R  | 23 |
| 13      | Myotis davidii                 | Vesper Bat                       | 1                  | M | A | A | A | I | A | S | S | L  | I  | R  | Q  | K  | R  | Q  | A  | R  | E  | S  | N           | S  | D  | R  | 23 |
| 14      | Myotis lucifugus               | Little Brown Bat                 | 1                  | M | A | A | A | I | A | S | S | L  | I  | R  | Q  | K  | R  | Q  | A  | R  | E  | S  | N           | S  | D  | R  | 23 |
| 15      | Rattus norvegicus              | Brown Rat                        | 1                  | M | A | A | A | I | A | S | S | L  | I  | R  | Q  | K  | R  | Q  | A  | R  | E  | S  | N           | S  | D  | R  | 23 |
| 16      | Spheniscus humboldti           | Humboldt Penguin                 | 1                  | M | A | A | A | I | A | S | S | L  | I  | R  | Q  | K  | R  | Q  | A  | R  | E  | S  | N           | S  | D  | R  | 23 |
| 17      | Thamnopis elegans              | Western Terrestrial Garter Snake | 1                  | M | A | A | A | I | A | S | S | L  | I  | R  | Q  | K  | R  | Q  | A  | R  | E  | S  | N           | S  | E  | R  | 23 |
| 18      | Todus mexicanus                | Puerto Rican Toddy               | 1                  | M | A | A | A | I | A | S | S | L  | I  | R  | Q  | K  | R  | Q  | A  | R  | E  | S  | N           | S  | D  | R  | 23 |
| 19      | Mus musculus                   | House Mouse                      | 1                  | M | A | A | A | I | A | S | S | L  | I  | R  | Q  | K  | R  | Q  | A  | R  | E  | S  | N           | S  | D  | R  | 23 |
| 20      | Arvicantis niloticus           | African grass rat                | 1                  | M | A | A | A | I | A | S | S | L  | I  | R  | Q  | K  | R  | Q  | A  | R  | E  | S  | N           | S  | D  | R  | 23 |
| 21      | Phocoena sinus                 | Porpoise                         | 1                  | M | A | A | A | I | A | S | S | L  | I  | R  | Q  | K  | R  | Q  | A  | R  | E  | S  | N           | S  | D  | R  | 23 |
| 22      | Camelus dromedarius            | Arabian Camel                    | 1                  | M | A | A | A | I | A | S | S | L  | I  | R  | Q  | K  | R  | Q  | A  | R  | E  | S  | N           | S  | D  | R  | 23 |
| 23      | Nannospalax galili             | Mole-rat                         | 1                  | M | A | A | A | I | A | S | S | L  | I  | R  | Q  | K  | R  | Q  | A  | R  | E  | S  | N           | S  | D  | R  | 23 |
| 24      | Camelus ferus                  | Bactrian Camel                   | 1                  | M | A | A | A | I | A | S | S | L  | I  | R  | Q  | K  | R  | Q  | A  | R  | E  | S  | N           | S  | D  | R  | 23 |
| 25      | Rhinolophus ferrumequinum      | Horseshoe Bat                    | 1                  | M | A | A | A | I | A | S | S | L  | I  | R  | Q  | K  | R  | Q  | A  | R  | E  | S  | N           | S  | D  | R  | 23 |
| 26      | Trichechus manatus latirostris | Florida Manatee                  | 1                  | M | A | A | A | I | A | S | S | L  | I  | R  | Q  | K  | R  | Q  | A  | R  | E  | S  | N           | S  | D  | R  | 23 |
| 27      | Lonchura striata domestica     | Society Finch                    | 1                  | M | A | A | A | I | A | S | S | L  | I  | R  | Q  | K  | R  | Q  | A  | R  | E  | S  | N           | S  | D  | R  | 23 |
| 28      | Tupaia chinensis               | Tree Shrew                       | 1                  | M | A | A | A | I | A | S | S | L  | I  | R  | Q  | K  | R  | Q  | A  | R  | E  | S  | N           | S  | D  | R  | 23 |
| 29      | Dasypus novemcinctus           | Nine-Banded Armadillo            | 1                  | M | A | A | A | I | A | S | S | L  | I  | R  | Q  | K  | R  | Q  | A  | R  | E  | S  | N           | S  | D  | R  | 23 |
| 30      | Ornithorhynchus anatinus       | Platypus                         | 1                  | M | A | A | A | I | A | S | S | L  | I  | R  | Q  | K  | R  | Q  | A  | R  | E  | S  | N           | S  | D  | R  | 23 |
| 31      | Camarrhynchus parvulus         | Small Tree Finch                 | 1                  | M | A | A | A | I | A | S | S | L  | I  | R  | Q  | K  | R  | Q  | A  | R  | E  | S  | N           | S  | D  | R  | 23 |
| 32      | Dromaius novaehollandiae       | Emu                              | 1                  | M | A | A | A | I | A | S | S | L  | I  | R  | Q  | K  | R  | Q  | A  | R  | E  | S  | N           | S  | D  | R  | 23 |
| 33      | Microcaecilia unicolor         | Microcaecilia unicolor           | 1                  | M | A | A | A | I | A | S | S | L  | I  | R  | Q  | K  | R  | Q  | A  | R  | E  | S  | N           | S  | D  | R  | 23 |
| 34      | Podarcis muralis               | Wall Lizard                      | 1                  | M | A | A | A | I | A | S | S | L  | I  | R  | Q  | K  | R  | Q  | A  | R  | E  | S  | N           | S  | D  | R  | 23 |
| 35      | Geotrypetes seraphini          | Gaboon Caecilian                 | 1                  | M | A | A | A | I | A | S | S | L  | I  | R  | Q  | K  | R  | Q  | A  | R  | E  | S  | N           | S  | D  | R  | 23 |
| 36      | Chrysemys picta bellii         | Western Painted Turtle           | 1                  | M | A | A | A | I | A | S | S | L  | I  | R  | Q  | K  | R  | Q  | A  | R  | E  | S  | N           | S  | E  | R  | 23 |
| 37      | Terrapene carolina triunguis   | Three-Toed Box Turtle            | 1                  | M | A | A | A | I | A | S | S | L  | I  | R  | Q  | K  | R  | Q  | A  | R  | E  | S  | N           | S  | E  | R  | 23 |
| 38      | Notechis scutatus              | Tiger Snake                      | 1                  | M | A | A | A | I | A | S | S | L  | I  | R  | Q  | K  | R  | Q  | A  | R  | E  | S  | N           | S  | E  | R  | 23 |
| 39      | Xenopus tropicalis             | Western Clawed Frog              | 1                  | M | A | A | A | I | A | S | S | L  | I  | R  | Q  | K  | R  | Q  | A  | R  | E  | S  | N           | S  | D  | R  | 23 |
| 40      | Gopherus evgoadei              | Goode's Thronscrub Tortoise      | 1                  | M | A | A | A | I | A | S | S | L  | I  | R  | Q  | K  | R  | Q  | A  | R  | E  | S  | N           | S  | E  | R  | 23 |
| 41      | Chelonoidis abingdonii         | Pinta Island Tortoise            | 1                  | M | A | A | A | I | A | S | S | L  | I  | R  | Q  | K  | R  | Q  | A  | R  | E  | S  | N           | S  | E  | R  | 23 |
| 42      | Labeo rohita                   | Rohu                             | 1                  | M | - | A | A | I | A | S | S | L  | I  | R  | Q  | K  | R  | Q  | A  | R  | E  | S  | N           | S  | D  | R  | 22 |
| 43      | Denticeps clupeoides           | Denticle Herring                 | 1                  | M | A | A | A | I | A | S | S | L  | I  | R  | Q  | K  | R  | Q  | A  | R  | E  | S  | N           | S  | D  | R  | 23 |
| 44      | Chanos chanos                  | Milkfish                         | 1                  | M | - | A | A | I | A | S | S | L  | I  | R  | Q  | K  | R  | Q  | A  | R  | E  | S  | N           | S  | D  | R  | 22 |
| 45      | Epinephelus lanceolatus        | Giant Grouper                    | 1                  | M | - | A | A | I | A | S | S | L  | I  | R  | Q  | K  | R  | Q  | A  | R  | E  | S  | N           | S  | D  | R  | 22 |
| 46      | Paramormyrops kingsleyae       | Paramormyrops kingsleyae         | 1                  | M | - | A | A | I | A | S | S | L  | I  | R  | Q  | K  | R  | Q  | A  | R  | E  | S  | N           | S  | D  | R  | 22 |
| 47      | Betta splendens                | Siamese Fighting Fish            | 1                  | M | - | A | A | I | A | S | S | L  | I  | R  | Q  | K  | R  | Q  | A  | R  | E  | S  | N           | S  | D  | R  | 22 |
| 48      | Anabas testudineus             | Climbing Perch                   | 1                  | M | A | A | A | I | A | S | S | L  | I  | R  | Q  | K  | R  | Q  | A  | R  | E  | S  | N           | S  | D  | K  | 23 |
| 49      | Notolabrus celidotus           | Spotty                           | 1                  | M | - | A | A | I | A | S | S | L  | I  | R  | Q  | K  | R  | Q  | A  | R  | E  | S  | N           | S  | D  | R  | 22 |
| 50      | Oryzias melastigma             | Marine Medaka                    | 1                  | M | - | A | A | I | A | S | S | L  | I  | R  | Q  | K  | R  | Q  | A  | R  | E  | S  | N           | S  | D  | R  | 22 |
| 51      | Oryzias latipes                | Japanese Rice Fish               | 1                  | M | - | A | A | I | A | S | S | L  | I  | R  | Q  | K  | R  | Q  | A  | R  | E  | S  | N           | S  | D  | R  | 22 |
| 52      | Fundulus heteroclitus          | Mummichog                        | 1                  | M | - | A | A | I | A | S | S | L  | I  | R  | Q  | K  | R  | Q  | A  | R  | E  | S  | N           | S  | D  | R  | 22 |
| 53      | Boleophthalmus pectinirostris  | Mudskipper                       | 1                  | M | - | A | A | I | A | S | S | L  | I  | R  | Q  | K  | R  | Q  | A  | R  | E  | S  | N           | S  | D  | R  | 22 |
| 54      | Labrus bergyllta               | Ballan Wrasse                    | 1                  | M | - | A | A | I | A | S | S | L  | I  | R  | Q  | K  | R  | Q  | A  | R  | E  | S  | N           | S  | D  | R  | 22 |
| 55      | Oreochromis niloticus          | Nile Tilapia                     | 1                  | M | - | A | A | I | A | S | S | L  | I  | R  | Q  | K  | R  | Q  | A  | R  | E  | S  | N           | S  | D  | R  | 22 |
| 56      | Hippoglossus hippoglossus      | Atlantic Halibut                 | 1                  | M | - | A | A | I | A | S | S | L  | I  | R  | Q  | K  | R  | Q  | A  | R  | E  | S  | N           | S  | D  | R  | 22 |

**Table S3**  
*(Related to Fig. 2)*  
**Comparison of FGF13A LTP Sequences From 63 Species**

LTP Sequence Table (Completely Conserved Positions Highlighted in Yellow, Positions Conserved in ≥ 90% of Species Highlighted in Green)

|    | Species                             | Common Name                      | Start Residue | M | A | A | I | A | S | L | I | R | Q  | K  | R  | Q  | A  | R  | E  | R  | E  | K  | S  | N  | End Residue |    |    |
|----|-------------------------------------|----------------------------------|---------------|---|---|---|---|---|---|---|---|---|----|----|----|----|----|----|----|----|----|----|----|----|-------------|----|----|
|    |                                     |                                  |               | 1 | 2 | 3 | 4 | 5 | 6 | 7 | 8 | 9 | 10 | 11 | 12 | 13 | 14 | 15 | 16 | 17 | 18 | 19 | 20 | 21 |             | 22 | 23 |
| 1  | <i>Loxodonta africana</i>           | African Bush Elephant            | 1             | M | A | A | A | I | A | S | S | L | I  | R  | Q  | K  | R  | Q  | A  | R  | E  | R  | E  | K  | S           | N  | 23 |
| 2  | <i>Vicugna pacos</i>                | Alpaca                           | 1             | M | A | A | A | I | A | S | S | L | I  | R  | Q  | K  | R  | Q  | A  | R  | E  | R  | E  | K  | S           | N  | 23 |
| 3  | <i>Urocyon parryi</i>               | Arctic Ground Squirrel           | 1             | M | A | A | A | I | A | S | S | L | I  | R  | Q  | K  | R  | Q  | A  | R  | E  | R  | E  | K  | S           | N  | 23 |
| 4  | <i>Alaudala cheleensis</i>          | Asian Short-Toed Lark            | 1             | M | A | A | A | I | A | S | S | L | I  | R  | Q  | K  | R  | Q  | A  | R  | E  | R  | E  | K  | S           | N  | 23 |
| 5  | <i>Serinus canaria</i>              | Atlantic Canary                  | 1             | M | A | A | A | I | A | S | S | L | I  | R  | Q  | K  | R  | Q  | A  | R  | E  | R  | E  | K  | S           | N  | 23 |
| 6  | <i>Hirundo rustica</i>              | Barn Swallow                     | 1             | M | A | A | A | I | A | S | S | L | I  | R  | Q  | K  | R  | Q  | A  | R  | E  | R  | E  | K  | S           | N  | 23 |
| 7  | <i>Limosa lapponica baueri</i>      | Bar-tailed Godwit                | 1             | M | A | A | A | I | A | S | S | L | I  | R  | Q  | K  | R  | Q  | A  | R  | E  | R  | E  | K  | S           | N  | 23 |
| 8  | <i>Rattus rattus</i>                | Black Rat                        | 1             | M | A | A | A | I | A | S | S | L | I  | R  | Q  | K  | R  | Q  | A  | R  | E  | R  | E  | K  | S           | N  | 23 |
| 9  | <i>Myotis brandtii</i>              | Brandt's Bat                     | 1             | M | A | A | A | I | A | S | S | L | I  | R  | Q  | K  | R  | Q  | A  | R  | E  | R  | E  | K  | S           | N  | 23 |
| 10 | <i>Python bivittatus</i>            | Burmese Python                   | 1             | M | A | A | A | I | A | S | S | L | I  | R  | Q  | K  | R  | Q  | A  | R  | E  | R  | E  | K  | S           | N  | 23 |
| 11 | <i>Bos taurus</i>                   | Cattle                           | 1             | M | A | A | A | I | A | S | S | L | I  | R  | Q  | K  | R  | Q  | A  | R  | E  | R  | E  | K  | S           | N  | 23 |
| 12 | <i>Alligator sinensis</i>           | Chinese Alligator                | 1             | M | A | A | A | I | A | S | S | L | I  | R  | Q  | K  | R  | Q  | A  | R  | E  | R  | E  | K  | S           | N  | 23 |
| 13 | <i>Macaca fascicularis</i>          | Crab-eating Macaque              | 1             | M | A | A | A | I | A | S | S | L | I  | R  | Q  | K  | R  | Q  | A  | R  | E  | R  | E  | K  | S           | N  | 23 |
| 14 | <i>Myotis davidii</i>               | David's Myotis                   | 1             | M | A | A | A | I | A | S | S | L | I  | R  | Q  | K  | R  | Q  | A  | R  | E  | R  | E  | K  | S           | N  | 23 |
| 15 | <i>Gopherus evgoodei</i>            | Desert Tortoise                  | 1             | M | A | A | A | I | A | S | S | L | I  | R  | Q  | K  | R  | Q  | A  | R  | E  | R  | E  | K  | S           | N  | 23 |
| 16 | <i>Canis lupus familiaris</i>       | Dog                              | 1             | M | A | A | A | I | A | S | S | L | I  | R  | Q  | K  | R  | Q  | A  | R  | E  | R  | E  | K  | S           | N  | 23 |
| 17 | <i>Camelus dromedarius</i>          | Dromedary                        | 1             | M | A | A | A | I | A | S | S | L | I  | R  | Q  | K  | R  | Q  | A  | R  | E  | R  | E  | K  | S           | N  | 23 |
| 18 | <i>Pseudonaja textilis</i>          | Eastern Brown Snake              | 1             | M | A | A | A | I | A | S | S | L | I  | R  | Q  | K  | R  | Q  | A  | R  | E  | R  | E  | K  | S           | N  | 23 |
| 19 | <i>Erithacus rubecula</i>           | European Robin                   | 1             | M | A | A | A | I | A | S | S | L | I  | R  | Q  | K  | R  | Q  | A  | R  | E  | R  | E  | K  | S           | N  | 23 |
| 20 | <i>Geotrypetes seraphini</i>        | Gaboon Caecilian                 | 1             | M | A | A | A | I | A | S | S | L | I  | R  | Q  | K  | R  | Q  | A  | R  | E  | R  | E  | K  | S           | N  | 23 |
| 21 | <i>Mesocricetus auratus</i>         | Golden Hamster                   | 1             | M | A | A | A | I | A | S | S | L | I  | R  | Q  | K  | R  | Q  | A  | R  | E  | R  | E  | K  | S           | N  | 23 |
| 22 | <i>Acrocephalus arundinaceus</i>    | Great Reed Warbler               | 1             | M | A | A | A | I | A | S | S | L | I  | R  | Q  | K  | R  | Q  | A  | R  | E  | R  | E  | K  | S           | N  | 23 |
| 23 | <i>Rhinolophus ferrumequinum</i>    | Greater Horseshoe Bat            | 1             | M | A | A | A | I | A | S | S | L | I  | R  | Q  | K  | R  | Q  | A  | R  | E  | R  | E  | K  | S           | N  | 23 |
| 24 | <i>Chelonia mydas</i>               | Green Sea Turtle                 | 1             | M | A | A | A | I | A | S | S | L | I  | R  | Q  | K  | R  | Q  | A  | R  | E  | R  | E  | K  | S           | N  | 23 |
| 25 | <i>Cavia porcellus</i>              | Guinea Pig                       | 1             | M | A | A | A | I | A | S | S | L | I  | R  | Q  | K  | R  | Q  | A  | R  | E  | R  | E  | K  | S           | N  | 23 |
| 26 | <i>Mus musculus</i>                 | House Mouse                      | 1             | M | T | A | A | I | A | S | S | L | I  | R  | Q  | K  | R  | Q  | A  | R  | E  | R  | E  | K  | S           | N  | 23 |
| 27 | <i>Homo sapiens</i>                 | Human                            | 1             | M | A | A | A | I | A | S | S | L | I  | R  | Q  | K  | R  | Q  | A  | R  | E  | R  | E  | K  | S           | N  | 23 |
| 28 | <i>Cercotrichas coryphoeus</i>      | Karoo Scrub Robin                | 1             | M | A | A | A | I | A | S | S | L | I  | R  | Q  | K  | R  | Q  | A  | R  | E  | R  | E  | K  | S           | N  | 23 |
| 29 | <i>Phascolarctos cinereus</i>       | Koala                            | 1             | M | A | A | A | I | A | S | S | L | I  | R  | Q  | K  | R  | Q  | A  | R  | E  | R  | E  | K  | S           | N  | 23 |
| 30 | <i>Turnix velox</i>                 | Little Buttonquail               | 1             | M | A | A | A | I | A | S | S | L | I  | R  | Q  | K  | R  | Q  | A  | R  | E  | R  | E  | K  | S           | N  | 23 |
| 31 | <i>Mionectes macconnelli</i>        | McConnell's Flycatcher           | 1             | M | A | A | A | I | A | S | S | L | I  | R  | Q  | K  | R  | Q  | A  | R  | E  | R  | E  | K  | S           | N  | 23 |
| 32 | <i>Suricata suricatta</i>           | Meerkat                          | 1             | M | A | A | A | I | A | S | S | L | I  | R  | Q  | K  | R  | Q  | A  | R  | E  | R  | E  | K  | S           | N  | 23 |
| 33 | <i>Meriones unguiculatus</i>        | Mongolian Gerbil                 | 1             | M | A | A | A | I | A | S | S | L | I  | R  | Q  | K  | R  | Q  | A  | R  | E  | R  | E  | K  | S           | N  | 23 |
| 34 | <i>Heterocephalus glaber</i>        | Naked Mole-rat                   | 1             | M | A | A | A | I | A | S | S | L | I  | R  | Q  | K  | R  | Q  | A  | R  | E  | R  | E  | K  | S           | N  | 23 |
| 35 | <i>Otolemur garnettii</i>           | Northern Greater Galago          | 1             | M | A | A | A | I | A | S | S | L | I  | R  | Q  | K  | R  | Q  | A  | R  | E  | R  | E  | K  | S           | N  | 23 |
| 36 | <i>Papio anubis</i>                 | Olive Baboon                     | 6             | M | A | A | A | I | A | S | S | L | I  | R  | Q  | K  | R  | Q  | A  | R  | E  | R  | E  | K  | S           | N  | 23 |
| 37 | <i>Chloropsis hardwickii</i>        | Orange-bellied Leafbird          | 1             | M | A | A | A | I | A | S | S | L | I  | R  | Q  | K  | R  | Q  | A  | R  | E  | R  | E  | K  | S           | N  | 23 |
| 38 | <i>Phainopepla nitens</i>           | Phainopepla                      | 1             | M | A | A | A | I | A | S | S | L | I  | R  | Q  | K  | R  | Q  | A  | R  | E  | R  | E  | K  | S           | N  | 23 |
| 39 | <i>Pedionomus torquatus</i>         | Plains-wanderer                  | 1             | M | A | A | A | I | A | S | S | L | I  | R  | Q  | K  | R  | Q  | A  | R  | E  | R  | E  | K  | S           | N  | 23 |
| 40 | <i>Ornithorhynchus anatinus</i>     | Platypus                         | 1             | M | A | A | A | I | A | S | S | L | I  | R  | Q  | K  | R  | Q  | A  | R  | E  | R  | E  | K  | S           | N  | 23 |
| 41 | <i>Protobothrops mucrosquamatus</i> | Pointed Scale Viper              | 1             | M | A | A | A | I | A | S | S | L | I  | R  | Q  | K  | R  | Q  | A  | R  | E  | R  | E  | K  | S           | N  | 23 |
| 42 | <i>Todus mexicanus</i>              | Puerto Rican Tody                | 1             | M | A | A | A | I | A | S | S | L | I  | R  | Q  | K  | R  | Q  | A  | R  | E  | R  | E  | K  | S           | N  | 23 |
| 43 | <i>Gallus gallus</i>                | Red Junglefowl                   | 1             | M | A | A | A | I | A | S | S | L | I  | R  | Q  | K  | R  | Q  | A  | R  | E  | R  | E  | K  | S           | N  | 23 |
| 44 | <i>Malurus elegans</i>              | Red-winged Fairywren             | 1             | M | A | A | A | I | A | S | S | L | I  | R  | Q  | K  | R  | Q  | A  | R  | E  | R  | E  | K  | S           | N  | 23 |
| 45 | <i>Macaca mulatta</i>               | Rhesus Macaque                   | 6             | M | A | A | A | I | A | S | S | L | I  | R  | Q  | K  | R  | Q  | G  | R  | E  | R  | E  | K  | S           | N  | 23 |
| 46 | <i>Rhinatrema bivittatum</i>        | Rhinatrema bivittatum            | 1             | M | A | A | A | I | A | S | S | L | I  | R  | Q  | K  | R  | Q  | A  | R  | E  | R  | E  | K  | S           | N  | 23 |
| 47 | <i>Origma solitaria</i>             | Rockwarbler                      | 1             | M | A | A | A | I | A | S | S | L | I  | R  | Q  | K  | R  | Q  | A  | R  | E  | R  | E  | K  | S           | N  | 23 |
| 48 | <i>Turdus rufiventris</i>           | Rufous-bellied thrush            | 1             | M | A | A | A | I | A | S | S | L | I  | R  | Q  | K  | R  | Q  | A  | R  | E  | R  | E  | K  | S           | N  | 23 |
| 49 | <i>Xiphophorus maculatus</i>        | Southern Platyfish               | 1             | M | A | A | A | I | A | S | S | L | I  | R  | Q  | K  | R  | Q  | A  | R  | E  | R  | E  | K  | S           | N  | 23 |
| 50 | <i>Drymodes brunneopygia</i>        | Southern Scrub Robin             | 1             | M | A | A | A | I | A | S | S | L | I  | R  | Q  | K  | R  | Q  | A  | R  | E  | R  | E  | K  | S           | N  | 23 |
| 51 | <i>Acipenser ruthenus</i>           | Sterlet                          | 1             | M | A | A | A | I | A | S | A | L | I  | R  | Q  | K  | R  | Q  | A  | R  | E  | R  | E  | K  | S           | N  | 23 |
| 52 | <i>Pongo abelii</i>                 | Sumatran Orangutan               | 1             | M | A | A | A | I | A | S | S | L | I  | R  | Q  | K  | R  | Q  | A  | R  | E  | R  | E  | K  | S           | N  | 23 |
| 53 | <i>Catharus ustulatus</i>           | Swainson's Thrush                | 1             | M | A | A | A | I | A | S | S | L | I  | R  | Q  | K  | R  | Q  | A  | R  | E  | R  | E  | K  | S           | N  | 23 |
| 54 | <i>Notechis scutatus</i>            | Tiger Snake                      | 1             | M | A | A | A | I | A | S | S | L | I  | R  | Q  | K  | R  | Q  | A  | R  | E  | R  | E  | K  | S           | N  | 23 |
| 55 | <i>Thalassophryne amazonica</i>     | Toadfish                         | 1             | M | A | A | A | I | A | S | S | L | I  | R  | Q  | K  | R  | Q  | A  | R  | E  | R  | E  | K  | S           | N  | 23 |
| 56 | <i>Tupaia chinensis</i>             | Treeshrew                        | 1             | M | A | A | A | I | A | S | S | L | I  | R  | Q  | K  | R  | Q  | A  | R  | E  | R  | E  | K  | S           | N  | 23 |
| 57 | <i>Podarcis muralis</i>             | Wall Lizard                      | 1             | M | A | A | A | I | A | S | S | L | I  | R  | Q  | K  | R  | Q  | A  | R  | E  | R  | E  | K  | S           | N  | 23 |
| 58 | <i>Xenopus tropicalis</i>           | Western Clawed Frog              | 1             | M | A | A | A | I | A | S | S | L | I  | R  | Q  | K  | R  | Q  | A  | R  | E  | R  | E  | K  | S           | N  | 23 |
| 59 | <i>Nicator chloris</i>              | Western Nicator                  | 1             | M | A | A | A | I | A | S | S | L | I  | R  | Q  | K  | R  | Q  | A  | R  | E  | R  | E  | K  | S           | N  | 23 |
| 60 | <i>Chrysemys picta bellii</i>       | Western Painted Turtle           | 1             | M | A | A | A | I | A | S | S | L | I  | R  | Q  | K  | R  | Q  | A  | R  | E  | R  | E  | K  | S           | N  | 23 |
| 61 | <i>Thamnophis elegans</i>           | Western Terrestrial Garter Snake | 1             | M | A | A | A | I | A | S | S | L | I  | R  | Q  | K  | R  | Q  | A  | R  | E  | R  | E  | K  | S           | N  | 23 |
| 62 | <i>Sus scrofa</i>                   | Wild Boar                        | 1             | M | A | A | A | I | A | S | S | L | I  | R  | Q  | K  | R  | Q  | A  | R  | E  | R  | E  | K  | S           | N  | 23 |
| 63 | <i>Taeniopygia guttata</i>          | Zebra Finch                      | 1             | M | A | A | A | I | A | S | S | L | I  | R  | Q  | K  | R  | Q  | A  | R  | E  | R  | E  | K  | S           | N  | 23 |

## Table S4 (Related to Fig. 2)

### Comparison of FGF14A LTP Sequences From 48 Species

**LTP Sequence Table (Completely Conserved Positions Highlighted in Yellow, Positions Conserved in ≥ 90% of Species Highlighted in Green)**

|    | Species                               | Common Name              | Start Residue | LTP Sequence |   |   |   |   |   |   |   |   |    |    |    |    |    |    |    |    |    |    |    |    |    | End Residue |    |
|----|---------------------------------------|--------------------------|---------------|--------------|---|---|---|---|---|---|---|---|----|----|----|----|----|----|----|----|----|----|----|----|----|-------------|----|
|    |                                       |                          |               | 1            | 2 | 3 | 4 | 5 | 6 | 7 | 8 | 9 | 10 | 11 | 12 | 13 | 14 | 15 | 16 | 17 | 18 | 19 | 20 | 21 | 22 |             | 23 |
| 1  | <i>Calypete anna</i>                  | Anna's Hummingbird       | 1             | M            | A | A | A | I | A | S | G | L | I  | R  | Q  | K  | R  | Q  | A  | R  | E  | Q  | H  | W  | D  | R           | 23 |
| 2  | <i>Scleropages formosus</i>           | Asian Arowana            | 1             | M            | A | A | A | I | A | S | G | L | I  | R  | Q  | K  | R  | Q  | A  | R  | E  | Q  | H  | I  | D  | R           | 23 |
| 3  | <i>Monopterus albus</i>               | Asian Swamp Eel          | 1             | M            | A | A | A | I | A | S | G | L | I  | R  | Q  | K  | R  | Q  | A  | R  | E  | Q  | H  | L  | D  | R           | 23 |
| 4  | <i>Alectura lathamii</i>              | Australian Brushturkey   | 1             | M            | A | A | A | I | A | S | G | L | I  | R  | Q  | K  | R  | Q  | A  | R  | E  | Q  | H  | W  | D  | R           | 23 |
| 5  | <i>Limosa lapponica baueri</i>        | Bar-tailed Godwit        | 1             | M            | A | A | A | I | A | S | G | L | I  | R  | Q  | K  | R  | Q  | A  | R  | E  | Q  | H  | W  | D  | R           | 23 |
| 6  | <i>Pteropus alecto</i>                | Black Flying Fox         | 1             | M            | A | A | A | I | A | S | G | L | I  | R  | Q  | K  | R  | Q  | A  | R  | E  | Q  | H  | W  | D  | R           | 23 |
| 7  | <i>Rattus rattus</i>                  | Black Rat                | 1             | M            | A | A | A | I | A | S | G | L | I  | R  | Q  | K  | R  | Q  | A  | R  | E  | Q  | H  | W  | D  | R           | 23 |
| 8  | <i>Felis catus</i>                    | Cat                      | 1             | M            | A | A | A | I | A | S | G | L | I  | R  | Q  | K  | R  | Q  | A  | R  | E  | Q  | H  | W  | D  | R           | 23 |
| 9  | <i>Cricetulus griseus</i>             | Chinese Hamster          | 1             | M            | A | A | A | I | A | S | G | L | I  | R  | Q  | K  | R  | Q  | A  | R  | E  | Q  | H  | W  | D  | R           | 23 |
| 10 | <i>Desmodus rotundus</i>              | Common Vampire Bat       | 1             | M            | A | A | A | I | A | S | G | L | I  | R  | Q  | K  | R  | Q  | A  | R  | E  | Q  | H  | W  | D  | R           | 23 |
| 11 | <i>Cotopercia gobio</i>               | Cotopercia               | 1             | M            | A | A | A | I | A | S | G | L | I  | R  | Q  | K  | R  | Q  | A  | R  | E  | Q  | H  | L  | D  | R           | 23 |
| 12 | <i>Cynoglossus semilaevis</i>         | Cynoglossus semilaevis   | 1             | M            | A | A | A | I | A | S | G | L | I  | R  | Q  | K  | R  | Q  | A  | R  | E  | Q  | H  | L  | D  | R           | 23 |
| 13 | <i>Denticiceps clupeioides</i>        | Denticle Herring         | 1             | M            | A | A | A | I | A | S | G | L | I  | R  | Q  | K  | R  | Q  | A  | R  | E  | Q  | H  | L  | D  | R           | 23 |
| 14 | <i>Canis lupus dingo</i>              | Dingo                    | 1             | M            | A | A | A | I | A | S | G | L | I  | R  | Q  | K  | R  | Q  | A  | R  | E  | Q  | H  | W  | D  | R           | 23 |
| 15 | <i>Camelus dromedarius</i>            | Dromedary                | 1             | M            | A | A | A | I | A | S | G | L | I  | R  | Q  | K  | R  | Q  | A  | R  | E  | Q  | T  | W  | D  | R           | 23 |
| 16 | <i>Electrophorus electricus</i>       | Electric Eel             | 1             | M            | A | A | A | I | A | S | G | L | I  | R  | Q  | K  | R  | Q  | A  | R  | E  | Q  | H  | L  | D  | R           | 23 |
| 17 | <i>Anguilla anguilla</i>              | European Eel             | 1             | M            | A | A | A | I | A | S | G | L | I  | R  | Q  | K  | R  | Q  | A  | R  | E  | Q  | H  | V  | D  | R           | 23 |
| 18 | <i>Geotrypetes seraphini</i>          | Gaboon Caecilian         | 1             | M            | A | A | A | I | A | S | G | L | I  | R  | Q  | K  | R  | Q  | A  | R  | E  | Q  | H  | L  | D  | R           | 23 |
| 19 | <i>Aquila chrysaetos chrysaetos</i>   | Golden Eagle             | 1             | M            | A | A | A | I | A | S | G | L | I  | R  | Q  | K  | R  | Q  | A  | R  | E  | Q  | H  | W  | D  | R           | 23 |
| 20 | <i>Microcebus murinus</i>             | Gray Mouse Lemur         | 1             | M            | A | A | A | I | A | S | G | L | I  | R  | Q  | K  | R  | Q  | A  | R  | E  | Q  | H  | W  | D  | R           | 23 |
| 21 | <i>Mus musculus</i>                   | House Mouse              | 1             | M            | A | A | A | I | A | S | G | L | I  | R  | Q  | K  | R  | Q  | A  | R  | E  | Q  | H  | W  | D  | R           | 23 |
| 22 | <i>Homo sapiens</i>                   | Human                    | 1             | M            | A | A | A | I | A | S | G | L | I  | R  | Q  | K  | R  | Q  | A  | R  | E  | Q  | H  | W  | D  | R           | 23 |
| 23 | <i>Clarais magur</i>                  | Indian Catfish           | 1             | M            | A | A | A | I | A | S | G | L | I  | R  | Q  | K  | R  | Q  | A  | R  | E  | Q  | H  | L  | D  | R           | 23 |
| 24 | <i>Oryzias latipes</i>                | Japanese Rice Fish       | 1             | M            | A | A | A | I | A | S | G | L | I  | R  | Q  | K  | R  | Q  | A  | R  | E  | Q  | H  | L  | D  | R           | 23 |
| 25 | <i>Trichechus manatus latirostris</i> | Manatee                  | 1             | M            | A | A | A | I | A | S | G | L | I  | R  | Q  | K  | R  | Q  | A  | R  | E  | Q  | H  | W  | D  | R           | 23 |
| 26 | <i>Microcaecilia unicolor</i>         | Microcaecilia unicolor   | 1             | M            | A | A | A | I | A | S | G | L | I  | R  | Q  | K  | R  | Q  | A  | R  | E  | Q  | H  | L  | D  | R           | 23 |
| 27 | <i>Chanos chanos</i>                  | Milkfish                 | 1             | M            | A | A | A | I | A | S | G | L | I  | R  | Q  | K  | R  | Q  | A  | R  | E  | Q  | H  | I  | D  | R           | 23 |
| 28 | <i>Fundulus heteroclitus</i>          | Mummichog                | 1             | M            | A | A | A | I | A | S | G | L | I  | R  | Q  | K  | R  | Q  | A  | R  | E  | Q  | H  | L  | D  | R           | 23 |
| 29 | <i>Dasyplus novemcinctus</i>          | Nine-banded Armadillo    | 1             | M            | A | A | A | I | A | S | G | L | I  | R  | Q  | K  | R  | Q  | A  | R  | E  | Q  | H  | W  | D  | R           | 23 |
| 30 | <i>Paramormyrops kingsleyae</i>       | Paramormyrops            | 1             | M            | A | A | A | I | A | S | G | L | I  | R  | Q  | K  | R  | Q  | A  | R  | E  | Q  | H  | I  | D  | R           | 23 |
| 31 | <i>Chelonoidis abingdonii</i>         | Pinta Island Tortoise    | 1             | M            | A | A | A | I | A | S | G | L | I  | R  | Q  | K  | R  | Q  | A  | R  | E  | Q  | H  | W  | D  | R           | 23 |
| 32 | <i>Microtus ochrogaster</i>           | Prairie Vole             | 1             | M            | A | A | A | I | A | S | G | L | I  | R  | Q  | K  | R  | Q  | A  | R  | E  | Q  | H  | W  | D  | R           | 23 |
| 33 | <i>Takifugu flavidus</i>              | Pufferfish               | 1             | M            | A | A | A | I | A | S | G | L | I  | R  | Q  | K  | R  | Q  | A  | R  | E  | Q  | H  | L  | D  | R           | 23 |
| 34 | <i>Gallus gallus</i>                  | Red Junglefowl           | 1             | M            | A | A | A | I | A | S | G | L | I  | R  | Q  | K  | R  | Q  | A  | R  | E  | Q  | H  | W  | D  | R           | 23 |
| 35 | <i>Erpetoichthys calabaricus</i>      | Reedfish                 | 1             | M            | A | A | A | I | A | S | G | L | I  | R  | Q  | K  | R  | Q  | A  | R  | E  | Q  | H  | T  | D  | R           | 23 |
| 36 | <i>Xiphophorus maculatus</i>          | Souther Platyfish        | 1             | M            | A | A | A | I | A | S | G | L | I  | R  | Q  | K  | R  | Q  | A  | R  | E  | Q  | H  | L  | D  | R           | 23 |
| 37 | <i>Mirounga leonina</i>               | Southern Elephant Seal   | 1             | M            | A | A | A | I | A | S | G | L | I  | R  | Q  | K  | R  | Q  | A  | R  | E  | Q  | H  | W  | D  | R           | 23 |
| 38 | <i>Nannospalax galili</i>             | Spalax                   | 1             | M            | A | A | A | I | A | S | G | L | I  | R  | Q  | K  | R  | Q  | A  | R  | E  | Q  | H  | W  | D  | R           | 23 |
| 39 | <i>Mustela erminea</i>                | Stoat                    | 1             | M            | A | A | A | I | A | S | G | L | I  | R  | Q  | K  | R  | Q  | A  | R  | E  | Q  | H  | W  | D  | R           | 23 |
| 40 | <i>Thalassophryne amazonica</i>       | Toadfish                 | 1             | M            | A | A | A | I | A | S | G | L | I  | R  | Q  | K  | R  | Q  | A  | R  | E  | Q  | H  | F  | D  | R           | 23 |
| 41 | <i>Amazona aestiva</i>                | Turquoise-fronted Amazon | 1             | M            | A | A | A | I | A | S | G | L | I  | R  | Q  | K  | R  | Q  | A  | R  | E  | Q  | H  | W  | D  | R           | 23 |
| 42 | <i>Rhinatrema bivittatum</i>          | Two-tailed Caecilian     | 1             | M            | A | A | A | I | A | S | G | L | I  | R  | Q  | K  | R  | Q  | A  | R  | E  | Q  | H  | L  | D  | R           | 23 |
| 43 | <i>Bubalus bubalis</i>                | Water Buffalo            | 1             | M            | A | A | A | I | A | S | G | L | I  | R  | Q  | K  | R  | Q  | A  | R  | E  | Q  | H  | W  | D  | R           | 23 |
| 44 | <i>Xenopus tropicalis</i>             | Western Clawed Frog      | 1             | M            | A | A | A | I | A | S | G | L | I  | R  | Q  | K  | R  | Q  | A  | R  | E  | Q  | H  | L  | D  | R           | 23 |
| 45 | <i>Chrysemys picta bellii</i>         | Western Painted Turtle   | 1             | M            | A | A | A | I | A | S | G | L | I  | R  | Q  | K  | R  | Q  | A  | R  | E  | Q  | H  | W  | D  | R           | 23 |
| 46 | <i>Zonotrichia albicollis</i>         | White-throated Sparrow   | 1             | M            | A | A | A | I | A | S | G | L | I  | R  | Q  | K  | R  | Q  | A  | R  | E  | Q  | H  | W  | D  | R           | 23 |
| 47 | <i>Sus scrofa</i>                     | Wild Boar                | 1             | M            | A | A | A | I | A | S | G | L | I  | R  | Q  | K  | R  | Q  | A  | R  | E  | Q  | H  | W  | D  | R           | 23 |
| 48 | <i>Mastacembelus armatus</i>          | Zig-zag Eel              | 1             | M            | A | A | A | I | A | S | G | L | I  | R  | Q  | K  | R  | Q  | A  | R  | E  | Q  | H  | L  | D  | R           | 23 |

**Table S5**  
*(Related to Fig. 2)*  
**Comparison of FGF11A CaMBD Sequences From 60 Species**

**CaMBD Sequence Table (Completely Conserved Positions Highlighted in Yellow, Positions Conserved in ≥ 90% of Species Highlighted in Green)**

| Species | Common Name                 | Start Residue                 | K  | S  | L  | C  | Q  | K  | Q  | L  | S  | K  | V  | R  | L  | C  | R  | P  | A  | R  | P  | D  | R  | End Residue |    |    |    |    |    |    |    |    |
|---------|-----------------------------|-------------------------------|----|----|----|----|----|----|----|----|----|----|----|----|----|----|----|----|----|----|----|----|----|-------------|----|----|----|----|----|----|----|----|
|         |                             |                               | 36 | 37 | 38 | 39 | 40 | 41 | 42 | 43 | 44 | 45 | 46 | 47 | 48 | 49 | 50 | 51 | 52 | 53 | 54 | 55 | 56 | 57          | 58 | 59 | 60 | 61 | 62 |    |    |    |
| 1       | Homo sapiens                | Human                         | 36 | K  | S  | L  | C  | Q  | K  | Q  | L  | L  | I  | L  | L  | S  | K  | V  | R  | L  | C  | G  | G  | R           | P  | A  | R  | P  | D  | R  | 62 |    |
| 2       | Danio rerio                 | Zebrafish                     | 36 | K  | S  | L  | C  | Q  | K  | Q  | I  | L  | I  | L  | I  | S  | K  | V  | R  | L  | C  | G  | G  | S           | R  | G  | R  | K  | L  | E  | K  | 62 |
| 3       | Pangasianodon hypophthalmus | Iridescent shark              | 36 | K  | S  | L  | C  | Q  | K  | Q  | I  | L  | I  | L  | I  | S  | K  | V  | R  | L  | C  | G  | G  | S           | R  | G  | R  | K  | L  | E  | K  | 62 |
| 4       | Anarrhichthys ocellatus     | Wolf eel                      | 36 | K  | S  | L  | C  | Q  | K  | Q  | I  | L  | I  | L  | I  | S  | K  | V  | R  | L  | C  | G  | G  | S           | R  | G  | R  | K  | L  | E  | K  | 62 |
| 5       | Myripristis murdjan         | Soldierfish                   | 36 | K  | S  | L  | C  | Q  | K  | Q  | I  | L  | I  | L  | I  | S  | K  | V  | R  | L  | C  | G  | G  | S           | R  | G  | R  | K  | M  | E  | K  | 62 |
| 6       | Hippoglossus hippoglossus   | Righteye Founder              | 36 | K  | S  | L  | C  | Q  | K  | Q  | I  | L  | I  | L  | I  | S  | K  | V  | R  | L  | C  | G  | G  | S           | R  | G  | R  | K  | L  | E  | K  | 62 |
| 7       | Oreochromis aureus          | Blue Tilapia                  | 36 | K  | S  | L  | C  | Q  | K  | Q  | I  | L  | I  | L  | I  | S  | K  | V  | R  | L  | C  | G  | G  | S           | R  | G  | R  | K  | L  | E  | K  | 62 |
| 8       | Denticipes clupeioides      | Denticle Herring              | 36 | K  | S  | L  | C  | Q  | K  | Q  | I  | L  | I  | L  | I  | S  | K  | V  | R  | L  | C  | G  | G  | S           | R  | G  | R  | K  | L  | E  | K  | 62 |
| 9       | Astyanax mexicanus          | Mexican Tetra                 | 36 | K  | S  | L  | C  | Q  | K  | Q  | I  | L  | I  | L  | I  | S  | K  | V  | R  | L  | C  | G  | G  | S           | R  | G  | R  | K  | L  | E  | K  | 62 |
| 10      | Cyprinus carpio             | Carp                          | 36 | K  | S  | L  | C  | Q  | K  | Q  | I  | L  | I  | L  | I  | S  | K  | V  | R  | L  | C  | G  | G  | S           | R  | G  | R  | K  | L  | V  | K  | 62 |
| 11      | Clupea harengus             | Atlantic Herring              | 36 | K  | S  | L  | C  | Q  | K  | Q  | I  | L  | I  | L  | I  | S  | K  | V  | R  | L  | C  | G  | G  | S           | R  | G  | R  | K  | L  | E  | K  | 62 |
| 12      | Scophthalmus maximus        | Turbot                        | 36 | K  | S  | L  | C  | Q  | K  | Q  | I  | L  | I  | L  | I  | S  | K  | V  | R  | L  | C  | G  | G  | S           | R  | G  | R  | K  | M  | E  | K  | 62 |
| 13      | Microcebus murinus          | Gray Mouse Lemur              | 36 | K  | S  | L  | C  | Q  | K  | Q  | L  | L  | I  | L  | L  | S  | K  | V  | R  | L  | C  | G  | G  | R           | P  | A  | R  | P  | D  | R  | 62 |    |
| 14      | Vicugna pacos               | Alpaca                        | 36 | K  | S  | L  | C  | Q  | K  | Q  | L  | L  | I  | L  | L  | S  | K  | V  | R  | L  | C  | G  | G  | R           | P  | A  | R  | P  | D  | R  | 62 |    |
| 15      | Macaca mulatta              | Rhesus Maceque                | 36 | K  | S  | L  | C  | Q  | K  | Q  | L  | L  | I  | L  | L  | S  | K  | V  | R  | L  | C  | G  | G  | R           | P  | A  | R  | P  | D  | R  | 62 |    |
| 16      | Papio anubis                | Olive Baboon                  | 36 | K  | S  | L  | C  | Q  | K  | Q  | L  | L  | I  | L  | L  | S  | K  | V  | R  | L  | C  | G  | G  | R           | P  | A  | R  | P  | D  | R  | 62 |    |
| 17      | Trachypitecus francoisi     | Tonkin leaf monkey            | 36 | K  | S  | L  | C  | Q  | K  | Q  | L  | L  | I  | L  | L  | S  | K  | V  | R  | L  | C  | G  | G  | R           | P  | A  | R  | P  | D  | R  | 62 |    |
| 18      | Castor canadensis           | North American Beaver         | 36 | K  | S  | L  | C  | Q  | K  | Q  | L  | L  | I  | L  | L  | S  | K  | V  | R  | L  | C  | G  | G  | R           | P  | A  | R  | P  | D  | R  | 62 |    |
| 19      | Rhinopithecus roxellana     | Golden snub-nosed monkey      | 36 | K  | S  | L  | C  | Q  | K  | Q  | L  | L  | I  | L  | L  | S  | K  | V  | R  | L  | C  | G  | G  | R           | P  | A  | R  | P  | D  | R  | 62 |    |
| 20      | Tupaia chinensis            | Treesbrew                     | 36 | K  | S  | L  | C  | Q  | K  | Q  | L  | L  | I  | L  | L  | S  | K  | V  | R  | L  | C  | G  | G  | R           | P  | A  | R  | P  | D  | R  | 62 |    |
| 21      | Carlito syrichta            | Philippine Tarsier            | 36 | K  | S  | L  | C  | Q  | K  | Q  | L  | L  | I  | L  | L  | S  | K  | V  | R  | L  | C  | G  | G  | R           | P  | A  | R  | P  | D  | R  | 62 |    |
| 22      | Canis lupus familiaris      | Dog                           | 36 | K  | S  | L  | C  | Q  | K  | Q  | L  | L  | I  | L  | L  | S  | K  | V  | R  | L  | C  | G  | G  | R           | P  | A  | R  | P  | D  | R  | 62 |    |
| 23      | Crocuta crocuta             | Spotted Hyena                 | 36 | K  | S  | L  | C  | Q  | K  | Q  | L  | V  | I  | L  | L  | S  | K  | V  | R  | L  | C  | G  | G  | R           | P  | A  | R  | P  | D  | R  | 62 |    |
| 24      | Canis lupus dingo           | Dingo                         | 36 | K  | S  | L  | C  | Q  | K  | Q  | L  | L  | I  | L  | L  | S  | K  | V  | R  | L  | C  | G  | G  | R           | P  | A  | R  | P  | D  | R  | 62 |    |
| 25      | Sapajus apella              | Tuffed Capuchin               | 36 | K  | S  | L  | C  | Q  | K  | Q  | L  | L  | I  | L  | L  | S  | K  | V  | R  | L  | C  | G  | G  | R           | P  | A  | R  | P  | D  | R  | 62 |    |
| 26      | Aotus nancymae              | Night Monkey                  | 36 | K  | S  | L  | C  | Q  | K  | Q  | L  | L  | I  | L  | L  | S  | K  | V  | R  | L  | C  | G  | G  | R           | P  | A  | R  | P  | D  | R  | 62 |    |
| 27      | Felis catus                 | Cat                           | 36 | K  | S  | L  | C  | Q  | K  | Q  | L  | V  | I  | L  | L  | S  | K  | V  | R  | L  | C  | G  | G  | R           | P  | A  | R  | P  | D  | R  | 62 |    |
| 28      | Zalophus californianus      | California Sea Lion           | 36 | K  | S  | L  | C  | Q  | K  | Q  | L  | L  | I  | L  | L  | S  | K  | V  | R  | L  | C  | G  | G  | R           | P  | A  | R  | P  | D  | R  | 62 |    |
| 29      | Nomascus leucogenys         | Northern White-Cheeked Gibbon | 36 | K  | S  | L  | C  | Q  | K  | Q  | L  | L  | I  | L  | L  | S  | K  | V  | R  | L  | C  | G  | G  | R           | P  | A  | R  | P  | D  | R  | 62 |    |
| 30      | Callorhinus ursinus         | Northern Fur Seal             | 36 | K  | S  | L  | C  | Q  | K  | Q  | L  | L  | I  | L  | L  | S  | K  | V  | R  | L  | C  | G  | G  | R           | P  | A  | R  | P  | D  | R  | 62 |    |
| 31      | Otolemur garnettii          | Northern Greater Galago       | 36 | K  | S  | L  | C  | Q  | K  | Q  | L  | L  | I  | L  | L  | S  | K  | V  | R  | L  | C  | G  | G  | R           | P  | T  | R  | P  | D  | R  | 62 |    |
| 32      | Pteropus alecto             | Black Flying Fox              | 36 | K  | S  | L  | C  | Q  | K  | Q  | L  | L  | I  | L  | L  | S  | K  | V  | R  | L  | C  | G  | G  | R           | P  | A  | R  | P  | N  | R  | 62 |    |
| 33      | Suricata suricatta          | Meerkat                       | 36 | K  | S  | L  | C  | Q  | K  | Q  | L  | V  | I  | L  | L  | S  | K  | V  | R  | L  | C  | G  | G  | R           | P  | S  | R  | P  | D  | R  | 62 |    |
| 34      | Dasylops novemcinctus       | None-banded Armadillo         | 36 | K  | S  | L  | C  | Q  | K  | Q  | L  | L  | V  | L  | L  | S  | K  | V  | R  | L  | C  | G  | G  | R           | P  | S  | R  | P  | D  | R  | 62 |    |
| 35      | Bos taurus                  | Cattle                        | 36 | K  | S  | L  | C  | Q  | K  | Q  | L  | L  | I  | L  | L  | S  | K  | V  | R  | L  | C  | G  | G  | R           | P  | A  | R  | T  | D  | R  | 62 |    |
| 36      | Phyllostomus discolor       | Pale Spear-nosed Bat          | 36 | K  | S  | L  | C  | Q  | K  | Q  | L  | L  | I  | L  | L  | S  | K  | V  | R  | L  | C  | G  | G  | R           | P  | G  | R  | P  | D  | H  | 62 |    |
| 37      | Hylobates moloch            | Silvery Gibbon                | 36 | K  | S  | L  | C  | Q  | K  | Q  | L  | L  | I  | L  | L  | S  | K  | V  | R  | L  | C  | G  | G  | R           | P  | P  | R  | P  | D  | R  | 62 |    |
| 38      | Pongo abelii                | Sumatran Orangutan            | 36 | K  | S  | L  | C  | Q  | K  | Q  | L  | L  | I  | L  | L  | S  | K  | V  | R  | L  | C  | G  | G  | R           | P  | A  | L  | P  | D  | R  | 62 |    |
| 39      | Heterocephalus glaber       | Naked mole-rat                | 36 | K  | S  | L  | C  | Q  | K  | Q  | L  | L  | I  | L  | L  | S  | K  | V  | R  | L  | C  | G  | G  | R           | P  | A  | P  | P  | D  | R  | 62 |    |
| 40      | Equus caballus              | Horse                         | 36 | K  | S  | L  | C  | Q  | K  | Q  | L  | L  | I  | L  | L  | S  | K  | V  | R  | L  | C  | G  | G  | R           | P  | A  | R  | P  | D  | R  | 62 |    |
| 41      | Ovis aries                  | Sheep                         | 36 | K  | S  | L  | C  | Q  | K  | Q  | L  | L  | I  | L  | L  | S  | K  | V  | R  | L  | C  | G  | G  | R           | P  | A  | R  | T  | D  | R  | 62 |    |
| 42      | Eptesicus fuscus            | Big Brown Bat                 | 36 | K  | S  | L  | C  | Q  | K  | Q  | L  | L  | I  | L  | L  | S  | K  | V  | R  | L  | C  | G  | G  | R           | P  | A  | R  | L  | D  | R  | 62 |    |
| 43      | Leptonychotes weddellii     | Weddell Seal                  | 36 | K  | S  | L  | C  | Q  | K  | Q  | L  | L  | I  | L  | L  | S  | K  | V  | R  | L  | C  | G  | G  | R           | P  | A  | R  | L  | D  | R  | 62 |    |
| 44      | Octodon degus               | Common Degu                   | 36 | K  | S  | L  | C  | Q  | K  | Q  | L  | L  | I  | L  | L  | S  | K  | V  | R  | L  | C  | G  | G  | R           | P  | A  | R  | P  | D  | R  | 62 |    |
| 45      | Gorilla gorilla gorilla     | Gorilla                       | 36 | K  | S  | L  | C  | Q  | K  | Q  | L  | L  | I  | L  | L  | S  | K  | V  | R  | L  | C  | G  | R  | P           | A  | R  | P  | D  | R  | 62 |    |    |
| 46      | Cavia porcellus             | Guinea Pig                    | 36 | K  | S  | L  | C  | Q  | K  | Q  | L  | L  | I  | L  | L  | S  | K  | V  | R  | L  | C  | G  | G  | R           | P  | A  | R  | P  | D  | R  | 62 |    |
| 47      | Callithrix jacchus          | Common Marmoset               | 36 | K  | S  | L  | C  | Q  | K  | Q  | L  | L  | I  | L  | L  | S  | K  | V  | R  | L  | C  | G  | G  | R           | P  | A  | R  | P  | D  | G  | 62 |    |
| 48      | Mus pahari                  | Gairdner's Shrewmouse         | 36 | K  | S  | L  | C  | Q  | K  | Q  | L  | L  | I  | L  | L  | S  | K  | V  | R  | L  | C  | G  | G  | R           | P  | T  | R  | Q  | D  | R  | 62 |    |
| 49      | Mirounga leonina            | Southern Elephant Seal        | 36 | K  | S  | L  | C  | Q  | K  | Q  | L  | L  | I  | L  | L  | S  | K  | V  | R  | L  | C  | G  | G  | R           | P  | A  | R  | L  | D  | R  | 62 |    |
| 50      | Mus musculus                | House Mouse                   | 36 | K  | S  | L  | C  | Q  | K  | Q  | L  | L  | I  | L  | L  | S  | K  | V  | R  | L  | C  | G  | G  | R           | P  | T  | R  | Q  | D  | R  | 62 |    |
| 51      | Ailuropoda melanoleuca      | Giant Panda                   | 36 | K  | S  | L  | C  | Q  | K  | Q  | L  | L  | V  | L  | L  | S  | K  | V  | R  | L  | C  | G  | G  | R           | P  | A  | R  | P  | A  | R  | 62 |    |
| 52      | Grammomys surdaster         | African Tree Rat              | 36 | K  | S  | L  | C  | Q  | K  | Q  | L  | L  | I  | L  | L  | S  | K  | V  | R  | L  | C  | G  | G  | R           | P  | T  | R  | Q  | D  | R  | 62 |    |
| 53      | Ursus arctos horribilis     | Grizzly Bear                  | 36 | K  | S  | L  | C  | Q  | K  | Q  | L  | L  | V  | L  | L  | S  | K  | V  | R  | L  | C  | G  | G  | R           | P  | A  | R  | P  | A  | R  | 62 |    |
| 54      | Nannospalax galili          | Blind Mole-rat                | 36 | K  | S  | L  | C  | Q  | K  | Q  | L  | L  | I  | L  | L  | S  | K  | V  | R  | L  | C  | G  | G  | R           | P  | T  | R  | Q  | D  | R  | 62 |    |
| 55      | Rattus norvegicus           | Brown Rat                     | 36 | K  | S  | L  | C  | Q  | K  | Q  | L  | L  | I  | L  | L  | S  | K  | V  | R  | L  | C  | G  | G  | R           | P  | T  | R  | Q  | D  | R  | 62 |    |
| 56      | Desmodus rotundus           | Vampire Bat                   | 36 | K  | S  | L  | C  | Q  | K  | Q  | L  | L  | I  | L  | L  | S  | K  | V  | R  | L  | C  | G  | G  | R           | S  | G  | R  | P  | D  | R  | 62 |    |
| 57      | Meriones unguiculatus       | Mongolian Gerbil              | 36 | K  | S  | L  | C  | Q  | K  | Q  | L  | L  | I  | L  | L  | S  | K  | V  | R  | L  | C  | G  | G  | R           | P  | T  | R  | Q  | D  | R  | 62 |    |
| 58      | Mus caroli                  | Ryukyu Mouse                  | 36 | K  | S  | L  | C  | Q  | K  | Q  | L  | L  | I  | L  | L  | S  | K  | V  | R  | L  | C  | G  | G  | R           | P  | T  | R  | Q  | D  | R  | 62 |    |
| 59      | Uroctellus parryii          | Arctic Ground Squirrel        | 36 | K  | S  | L  | C  | Q  | K  | Q  | L  | L  | I  | L  | L  | S  | K  | V  | R  | L  | C  | G  | G  | R           | P  | T  | R  | Q  | D  | R  | 62 |    |
| 60      | Lontra canadensis           | North American River Otter    | 36 | K  | S  | L  | C  | Q  | K  | Q  | L  | L  | I  | L  | L  | S  | K  | V  | R  | L  | C  | G  | G  | R           | P  | S  | R  | P  | D  | R  | 62 |    |

**Table S6**  
(Related to Fig. 2)  
**Comparison of FGF12A CaMBD Sequences From 56 Species**

**CaMBD Sequence Table (Completely Conserved Positions Highlighted in Yellow, Positions Conserved in  $\geq 90\%$  of Species Highlighted in Green)**

| Species | Common Name                    | Start Residue                    | CaMBD Sequence |   |   |   |   |   |   |   |   |   |   |   |   |   |   |   |   |   |   |   |   |   |   |   |   |   |   | End Residue |    |
|---------|--------------------------------|----------------------------------|----------------|---|---|---|---|---|---|---|---|---|---|---|---|---|---|---|---|---|---|---|---|---|---|---|---|---|---|-------------|----|
|         |                                |                                  | R              | S | L | C | E | R | H | V | F | S | K | V | R | F | C | G | K | R | P | V | R | R |   |   |   |   |   |             |    |
| 1       | Homo sapiens                   | Human                            | 38             | R | S | L | C | E | R | H | V | L | G | V | F | S | K | V | R | F | C | S | G | R | K | R | P | V | R | R           | 64 |
| 2       | Danio rerio                    | Zebrafish                        | 37             | R | S | L | C | E | R | H | F | L | G | V | F | S | K | V | R | F | C | S | G | K | K | R | P | V | R | R           | 63 |
| 3       | Aptenyx rowi                   | Kiwi                             | 38             | R | S | L | C | E | R | H | V | L | G | V | F | S | K | V | R | F | C | S | G | R | K | R | P | V | R | R           | 64 |
| 4       | Castor canadensis              | North American Beaver            | 38             | R | S | L | C | E | R | H | V | L | G | V | F | S | K | V | R | F | C | S | G | R | K | R | P | V | R | R           | 64 |
| 5       | Cavia porcellus                | Guinea Pig                       | 38             | R | S | L | C | E | R | H | V | L | G | V | F | S | K | V | R | F | C | S | G | R | K | R | P | V | R | R           | 64 |
| 6       | Cricetulus griseus             | Chinese Hamster                  | 38             | R | S | L | C | E | R | H | V | L | G | V | F | S | K | V | R | F | C | S | G | R | K | R | P | V | R | R           | 64 |
| 7       | Cyprinus carpio                | Common Carp                      | 38             | R | S | L | C | E | R | H | V | L | G | V | F | S | K | V | R | F | C | S | G | K | K | I | P | V | R | R           | 64 |
| 8       | Fukomys damarensis             | Damaraland Mole-Rat              | 38             | R | S | L | C | E | R | H | V | L | G | V | F | S | K | V | R | F | C | S | G | R | K | R | P | V | R | R           | 64 |
| 9       | Gallus gallus                  | Red Junglefowl                   | 38             | R | S | L | C | E | R | H | V | L | G | V | F | S | K | V | R | F | C | S | G | R | K | R | P | V | R | R           | 64 |
| 10      | Lynx pardinus                  | Iberian Lynx                     | 38             | R | S | L | C | E | R | H | V | L | G | V | F | S | K | V | R | F | C | S | G | R | K | R | P | V | R | R           | 64 |
| 11      | Macaca mulatta                 | Rhesus Macaque                   | 38             | R | S | L | C | E | R | H | V | L | G | V | F | S | K | V | R | F | C | S | G | R | K | R | P | V | R | R           | 64 |
| 12      | Mirounga leonina               | Southern Elephant Seal           | 38             | R | S | L | C | E | R | H | V | L | G | V | F | S | K | V | R | F | C | S | G | R | K | R | P | V | R | R           | 64 |
| 13      | Myotis davidii                 | Vesper Bat                       | 38             | R | S | L | C | E | R | H | V | L | G | V | F | S | K | V | R | F | C | S | G | R | K | R | P | V | R | R           | 64 |
| 14      | Myotis lucifugus               | Little Brown Bat                 | 38             | R | S | L | C | E | R | H | V | L | G | V | F | S | K | V | R | F | C | S | G | R | K | R | P | V | R | R           | 64 |
| 15      | Rattus norvegicus              | Brown Rat                        | 38             | R | S | L | C | E | R | H | V | L | G | V | F | S | K | V | R | F | C | S | G | R | K | R | P | V | R | R           | 64 |
| 16      | Spheniscus humboldti           | Humboldt Penguin                 | 38             | R | S | L | C | E | R | H | V | L | G | V | F | S | K | V | R | F | C | S | G | R | K | R | H | V | R | R           | 64 |
| 17      | Thamnophis elegans             | Western Terrestrial Garter Snake | 38             | R | S | L | C | E | R | H | V | L | G | V | F | S | K | V | R | F | C | S | G | R | K | R | P | V | R | R           | 64 |
| 18      | Todus mexicanus                | Puerto Rican Tody                | 38             | R | S | L | C | E | R | H | V | L | G | V | F | S | K | V | R | F | C | S | G | R | K | R | P | V | R | R           | 64 |
| 19      | Mus musculus                   | House Mouse                      | 38             | R | S | L | C | E | R | H | V | L | G | V | F | S | K | V | R | F | C | S | G | R | K | R | P | V | R | R           | 64 |
| 20      | Arvicanthis niloticus          | African grass rat                | 38             | R | S | L | C | E | R | H | V | L | G | V | F | S | K | V | R | F | C | S | G | R | K | R | P | V | R | R           | 64 |
| 21      | Phocoena sinus                 | Porpoise                         | 38             | R | S | L | C | E | R | H | V | L | G | V | F | S | K | V | R | F | C | S | G | R | K | R | P | V | R | R           | 64 |
| 22      | Camelus dromedarius            | Arabian Camel                    | 38             | R | S | L | C | E | R | H | V | L | G | V | F | S | K | V | R | F | C | S | G | R | K | R | P | V | R | R           | 64 |
| 23      | Nannospalax gallii             | Mole-rat                         | 38             | R | S | L | C | E | R | H | V | L | G | V | F | S | K | V | R | F | C | S | G | R | K | R | P | V | R | R           | 64 |
| 24      | Camelus ferus                  | Bactrian Camel                   | 38             | R | S | L | C | E | R | H | V | L | G | V | F | S | K | V | R | F | C | S | G | R | K | R | P | V | R | R           | 64 |
| 25      | Rhinolophus ferrumequinum      | Horseshoe Bat                    | 38             | R | S | L | C | E | R | H | V | L | G | V | F | S | K | V | R | F | C | S | G | R | K | R | P | V | R | R           | 64 |
| 26      | Trichechus manatus latirostris | Florida Manatee                  | 38             | R | S | L | C | E | R | H | V | L | G | V | F | S | K | V | R | F | C | S | G | R | K | R | P | V | R | R           | 64 |
| 27      | Lonchura striata domestica     | Society Finch                    | 38             | R | S | L | C | E | R | H | V | L | G | V | F | S | K | V | R | F | C | S | G | R | K | R | P | V | R | R           | 64 |
| 28      | Tupaia chinensis               | Tree Shrew                       | 38             | R | S | L | C | E | R | H | V | L | G | V | F | S | K | V | R | F | C | S | G | R | K | R | P | V | R | R           | 64 |
| 29      | Dasyops novemcinctus           | Nine-Banded Armadillo            | 38             | R | S | L | C | E | R | H | V | L | G | V | F | S | K | V | R | F | C | S | G | R | K | R | P | V | R | R           | 64 |
| 30      | Ornithorhynchus anatinus       | Platypus                         | 38             | R | S | L | C | E | R | H | V | L | G | V | F | S | K | V | R | F | C | S | G | R | K | R | P | V | R | R           | 64 |
| 31      | Camarhynchus parvulus          | Small Tree Finch                 | 38             | R | S | L | C | E | R | H | V | L | G | V | F | S | K | V | R | F | C | S | G | R | K | R | P | V | R | R           | 64 |
| 32      | Dromaius novaehollandiae       | Emu                              | 38             | R | S | L | C | E | R | H | V | L | G | V | F | S | K | V | R | F | C | S | G | R | K | R | P | V | R | R           | 64 |
| 33      | Microcaecilia unicolor         | Microcaecilia unicolor           | 38             | R | S | L | C | E | R | H | V | L | G | V | F | S | K | V | R | F | C | S | G | R | K | R | P | V | R | R           | 64 |
| 34      | Podarcis muralis               | Wall Lizard                      | 38             | R | S | L | C | E | R | H | V | L | G | V | F | S | K | V | R | F | C | S | G | R | K | R | H | V | R | R           | 64 |
| 35      | Geotrypetes seraphini          | Gaboon Caecilian                 | 38             | R | S | L | C | E | R | H | V | L | G | V | F | S | K | V | R | F | C | S | G | R | K | K | P | V | R | R           | 64 |
| 36      | Chrysemys picta bellii         | Western Painted Turtle           | 38             | R | S | L | C | E | R | H | V | L | G | V | F | S | K | V | R | F | C | S | G | R | K | R | P | V | R | R           | 64 |
| 37      | Terrapene carolina triunguis   | Three-Toed Box Turtle            | 38             | R | S | L | C | E | R | H | V | L | G | V | F | S | K | V | R | F | C | S | G | R | K | R | P | V | R | R           | 64 |
| 38      | Notechis scutatus              | Tiger Snake                      | 38             | R | S | L | C | E | R | H | V | L | G | V | F | S | K | V | R | F | C | S | G | R | K | R | H | V | R | R           | 64 |
| 39      | Xenopus tropicalis             | Western Clawed Frog              | 38             | R | S | L | C | E | R | H | V | L | G | V | F | S | K | V | R | F | C | S | G | R | K | R | P | V | R | R           | 64 |
| 40      | Gopherus evgoodei              | Goode's Thronscrub Tortoise      | 38             | R | S | L | C | E | R | H | V | L | G | V | F | S | K | V | R | F | C | S | G | R | K | R | P | V | R | R           | 64 |
| 41      | Chelonoidis abingdonii         | Pinta Island Tortoise            | 38             | R | S | L | C | E | R | H | V | L | G | V | F | S | K | V | R | F | C | S | G | R | K | R | P | V | R | R           | 64 |
| 42      | Labeo rohita                   | Roahu                            | 37             | R | S | L | C | E | R | H | F | L | G | V | F | S | K | V | R | F | C | S | G | K | K | R | P | V | R | R           | 63 |
| 43      | Denticeps clupeioides          | Denticle Herring                 | 38             | R | S | L | C | E | R | H | F | L | G | V | F | S | K | V | R | F | C | S | G | K | K | R | P | V | R | R           | 64 |
| 44      | Chanos chanos                  | Milkfish                         | 37             | R | S | L | C | E | R | H | F | L | G | V | F | S | K | V | R | F | C | S | G | K | K | R | P | V | R | R           | 63 |
| 45      | Epinephelus lanceolatus        | Giant Grouper                    | 37             | R | S | L | C | E | R | H | F | L | G | V | F | S | K | V | R | F | C | S | G | K | K | R | P | V | R | R           | 63 |
| 46      | Paramormyrops kingsleyae       | Paramormyrops kingsleyae         | 37             | R | S | L | C | E | R | H | F | L | G | V | F | S | K | V | R | F | C | S | G | K | K | R | P | V | R | R           | 63 |
| 47      | Betta splendens                | Siamese Fighting Fish            | 37             | R | S | L | C | E | R | H | F | L | G | V | F | S | K | V | R | F | C | S | G | K | K | R | P | V | R | R           | 63 |
| 48      | Anabas testudineus             | Climbing Perch                   | 38             | R | S | L | C | E | R | H | F | L | G | V | F | S | K | V | R | F | C | S | G | K | K | R | P | V | R | R           | 64 |
| 49      | Notolabrus celidotus           | Spotty                           | 37             | R | S | L | C | E | R | H | F | L | G | V | F | S | K | V | R | F | C | S | G | K | K | R | P | V | R | R           | 63 |
| 50      | Oryzias melastigma             | Marine Medaka                    | 37             | R | S | L | C | E | R | H | F | L | G | V | F | S | K | V | R | F | C | S | G | K | K | R | P | V | R | R           | 63 |
| 51      | Oryzias latipes                | Japanese Rice Fish               | 37             | R | S | L | C | E | R | H | F | L | G | V | F | S | K | V | R | F | C | S | G | K | K | R | P | V | R | R           | 63 |
| 52      | Fundulus heteroclitus          | Mummichog                        | 37             | R | S | L | C | E | R | H | F | L | G | V | F | S | K | V | R | F | C | S | G | K | K | R | P | V | R | R           | 63 |
| 53      | Boleophthalmus pectinirostris  | Mudskipper                       | 37             | R | S | L | C | E | R | H | F | L | G | V | F | S | K | V | R | F | C | S | G | K | K | R | P | V | R | R           | 63 |
| 54      | Labrus bergylla                | Ballan Wrasse                    | 37             | R | S | L | C | E | R | H | F | L | G | V | F | S | K | V | R | F | C | S | G | K | K | R | P | V | R | R           | 63 |
| 55      | Oreochromis niloticus          | Nile Tilapia                     | 37             | R | S | L | C | E | R | H | F | L | G | V | F | S | K | V | R | F | C | S | G | K | K | R | P | V | R | R           | 63 |
| 56      | Hippoglossus hippoglossus      | Atlantic Halibut                 | 37             | R | S | L | C | E | R | H | F | L | G | V | F | S | K | V | R | F | C | S | G | K | K | R | P | V | R | R           | 63 |

## Table S7 (Related to Fig. 2)

### Comparison of FGF13A CaMBD Sequences From 53 Species

CaMBD Sequence Table (Completely Conserved Positions Highlighted in Yellow, Positions Conserved in ≥ 90% of Species Highlighted in Green)

| Species | Common Name                      | Start Residue           | Sequence |    |    |    |    |    |    |    |    |    |    |    |    |    |    |    |    |    |    |    |    |    |    |    |    |    |    |  |  |  |  |  |  |  |  |  | End Residue |
|---------|----------------------------------|-------------------------|----------|----|----|----|----|----|----|----|----|----|----|----|----|----|----|----|----|----|----|----|----|----|----|----|----|----|----|--|--|--|--|--|--|--|--|--|-------------|
|         |                                  |                         | 35       | 36 | 37 | 38 | 39 | 40 | 41 | 42 | 43 | 44 | 45 | 46 | 47 | 48 | 49 | 50 | 51 | 52 | 53 | 54 | 55 | 56 | 57 | 58 | 59 | 60 |    |  |  |  |  |  |  |  |  |  |             |
| 1       | <i>Homo sapiens</i>              | Human                   | K        | T  | S  | C  | D  | K  | N  | K  | L  | N  | V  | F  | S  | R  | V  | K  | L  | F  | G  | S  | K  | K  | R  | R  | R  | R  | 60 |  |  |  |  |  |  |  |  |  |             |
| 2       | <i>Myotis davidii</i>            | David's Myotis          | K        | T  | S  | C  | D  | K  | N  | K  | L  | N  | V  | F  | S  | R  | V  | K  | L  | F  | G  | S  | K  | K  | R  | R  | R  | R  | 60 |  |  |  |  |  |  |  |  |  |             |
| 3       | <i>Meriones unguiculatus</i>     | Mongolian Gerbil        | K        | T  | S  | C  | D  | K  | N  | K  | L  | N  | V  | F  | S  | R  | V  | K  | L  | F  | G  | S  | K  | K  | R  | R  | R  | R  | 60 |  |  |  |  |  |  |  |  |  |             |
| 4       | <i>Myotis brandtii</i>           | Brandt's Bat            | K        | T  | S  | C  | D  | K  | N  | K  | L  | N  | V  | F  | S  | R  | V  | K  | L  | F  | G  | S  | K  | K  | R  | R  | R  | R  | 60 |  |  |  |  |  |  |  |  |  |             |
| 5       | <i>Tupaia chinensis</i>          | Treeshrew               | K        | T  | S  | C  | D  | K  | N  | K  | L  | N  | V  | F  | S  | R  | V  | K  | L  | F  | G  | S  | K  | K  | R  | R  | R  | R  | 60 |  |  |  |  |  |  |  |  |  |             |
| 6       | <i>Camelus dromedarius</i>       | Dromedary               | K        | T  | S  | C  | D  | K  | N  | K  | L  | N  | V  | F  | S  | R  | V  | K  | L  | F  | G  | S  | K  | K  | R  | R  | R  | R  | 60 |  |  |  |  |  |  |  |  |  |             |
| 7       | <i>Vicugna pacos</i>             | Alpaca                  | K        | T  | S  | C  | D  | K  | N  | K  | L  | N  | V  | F  | S  | R  | V  | K  | L  | F  | G  | S  | K  | K  | R  | R  | R  | R  | 60 |  |  |  |  |  |  |  |  |  |             |
| 8       | <i>Rhinolophus ferrumequinum</i> | Greater Horseshoe Bat   | K        | T  | S  | C  | D  | K  | N  | K  | L  | N  | V  | F  | S  | R  | V  | K  | L  | F  | G  | S  | K  | K  | R  | R  | R  | R  | 60 |  |  |  |  |  |  |  |  |  |             |
| 9       | <i>Bos taurus</i>                | Cattle                  | K        | T  | S  | C  | D  | K  | N  | K  | L  | N  | V  | F  | S  | R  | V  | K  | L  | F  | G  | S  | K  | K  | R  | R  | R  | R  | 60 |  |  |  |  |  |  |  |  |  |             |
| 10      | <i>Suricata suricatta</i>        | Meerkat                 | K        | T  | S  | C  | D  | K  | N  | K  | L  | N  | V  | F  | S  | R  | V  | K  | L  | F  | G  | S  | K  | K  | R  | R  | R  | R  | 60 |  |  |  |  |  |  |  |  |  |             |
| 11      | <i>Loxodonta africana</i>        | African Bush Elephant   | K        | T  | S  | C  | D  | K  | N  | K  | L  | N  | V  | F  | S  | R  | V  | K  | L  | F  | G  | S  | K  | K  | R  | R  | R  | R  | 60 |  |  |  |  |  |  |  |  |  |             |
| 12      | <i>Cavia porcellus</i>           | Guinea Pig              | K        | T  | S  | C  | D  | K  | N  | K  | L  | N  | V  | F  | S  | R  | V  | K  | L  | F  | G  | S  | K  | K  | R  | R  | R  | R  | 60 |  |  |  |  |  |  |  |  |  |             |
| 13      | <i>Pongo abelii</i>              | Sumatran Orangutan      | K        | T  | S  | C  | D  | K  | N  | K  | L  | N  | V  | F  | S  | R  | V  | K  | L  | F  | G  | S  | K  | K  | R  | R  | R  | R  | 60 |  |  |  |  |  |  |  |  |  |             |
| 14      | <i>Sus scrofa</i>                | Wild Boar               | K        | T  | S  | C  | D  | K  | N  | K  | L  | N  | V  | F  | S  | R  | V  | K  | L  | F  | G  | S  | K  | K  | R  | R  | R  | R  | 60 |  |  |  |  |  |  |  |  |  |             |
| 15      | <i>Otolemur garnettii</i>        | Northern Greater Galago | K        | T  | S  | C  | D  | K  | N  | K  | L  | N  | V  | F  | S  | R  | V  | K  | L  | F  | G  | S  | K  | K  | R  | R  | R  | R  | 60 |  |  |  |  |  |  |  |  |  |             |
| 16      | <i>Uroctellus parryii</i>        | Arctic Ground Squirrel  | K        | T  | S  | C  | D  | K  | N  | K  | L  | N  | V  | F  | S  | R  | V  | K  | L  | F  | G  | S  | K  | K  | R  | R  | R  | R  | 60 |  |  |  |  |  |  |  |  |  |             |
| 17      | <i>Mesocricetus auratus</i>      | Golden Hamster          | K        | T  | S  | C  | D  | K  | N  | K  | L  | N  | V  | F  | S  | R  | V  | K  | L  | F  | G  | S  | K  | K  | R  | R  | R  | R  | 60 |  |  |  |  |  |  |  |  |  |             |
| 18      | <i>Macaca fascicularis</i>       | Crab-eating Macaque     | K        | T  | S  | C  | D  | K  | N  | K  | L  | N  | V  | F  | S  | R  | V  | K  | L  | F  | G  | S  | K  | K  | R  | R  | R  | R  | 60 |  |  |  |  |  |  |  |  |  |             |
| 19      | <i>Heterocephalus glaber</i>     | Naked Mole-rat          | K        | T  | S  | C  | D  | K  | N  | K  | L  | N  | V  | F  | S  | R  | V  | K  | L  | F  | G  | S  | K  | K  | R  | R  | R  | R  | 60 |  |  |  |  |  |  |  |  |  |             |
| 20      | <i>Mus musculus</i>              | House Mouse             | K        | T  | S  | C  | D  | K  | N  | K  | L  | N  | V  | F  | S  | R  | V  | K  | L  | F  | G  | S  | K  | K  | R  | R  | R  | R  | 60 |  |  |  |  |  |  |  |  |  |             |
| 21      | <i>Canis lupus familiaris</i>    | Dog                     | K        | T  | S  | C  | D  | K  | N  | K  | L  | N  | V  | F  | S  | R  | V  | K  | L  | F  | G  | S  | K  | K  | R  | R  | R  | R  | 60 |  |  |  |  |  |  |  |  |  |             |
| 22      | <i>Rattus rattus</i>             | Black Rat               | K        | T  | S  | C  | D  | K  | N  | K  | L  | N  | V  | F  | S  | R  | V  | K  | L  | F  | G  | S  | K  | K  | A  | Q  | K  | G  | 60 |  |  |  |  |  |  |  |  |  |             |
| 23      | <i>Limosa lapponica baueri</i>   | Bar-tailed Godwit       | K        | G  | S  | C  | D  | K  | N  | K  | L  | N  | V  | F  | S  | R  | V  | K  | L  | F  | G  | S  | K  | K  | R  | R  | R  | R  | 60 |  |  |  |  |  |  |  |  |  |             |
| 24      | <i>Nicator chloris</i>           | Western Nicator         | K        | G  | S  | C  | D  | K  | N  | K  | L  | N  | V  | F  | S  | R  | V  | K  | L  | F  | G  | S  | K  | K  | R  | R  | R  | R  | 60 |  |  |  |  |  |  |  |  |  |             |
| 25      | <i>Malurus elegans</i>           | Red-winged Fairywren    | K        | G  | S  | C  | D  | K  | N  | K  | L  | N  | V  | F  | S  | R  | V  | K  | L  | F  | G  | S  | K  | K  | R  | R  | R  | R  | 60 |  |  |  |  |  |  |  |  |  |             |
| 26      | <i>Origma solitaria</i>          | Rockwarbler             | K        | G  | S  | C  | D  | K  | N  | K  | L  | N  | V  | F  | S  | R  | V  | K  | L  | F  | G  | S  | K  | K  | R  | R  | R  | R  | 60 |  |  |  |  |  |  |  |  |  |             |
| 27      | <i>Acrocephalus arundinaceus</i> | Great Reed Warbler      | K        | G  | S  | C  | D  | K  | N  | K  | L  | N  | V  | F  | S  | R  | V  | K  | L  | F  | G  | S  | K  | K  | R  | R  | R  | R  | 60 |  |  |  |  |  |  |  |  |  |             |
| 28      | <i>Mionectes macconnelli</i>     | McConnell's Flycatcher  | K        | G  | S  | C  | D  | K  | N  | K  | L  | N  | V  | F  | S  | R  | V  | K  | L  | F  | G  | S  | K  | K  | R  | R  | R  | R  | 60 |  |  |  |  |  |  |  |  |  |             |
| 29      | <i>Drymodes brunneopygia</i>     | Southern Scrub Robin    | K        | G  | S  | C  | D  | K  | N  | K  | L  | N  | V  | F  | S  | R  | V  | K  | L  | F  | G  | S  | K  | K  | R  | R  | R  | R  | 60 |  |  |  |  |  |  |  |  |  |             |
| 30      | <i>Todus mexicanus</i>           | Puerto Rican Tody       | K        | G  | S  | C  | D  | K  | N  | K  | L  | N  | V  | F  | S  | R  | V  | K  | L  | F  | G  | S  | K  | K  | R  | R  | R  | R  | 60 |  |  |  |  |  |  |  |  |  |             |
| 31      | <i>Hirundo rustica</i>           | Barn Swallow            | K        | G  | S  | C  | D  | K  | N  | K  | L  | N  | V  | F  | S  | R  | V  | K  | L  | F  | G  | S  | K  | K  | R  | R  | R  | R  | 60 |  |  |  |  |  |  |  |  |  |             |
| 32      | <i>Pedionomus torquatus</i>      | Plains-wanderer         | K        | G  | N  | C  | D  | K  | N  | K  | L  | N  | V  | F  | S  | R  | V  | K  | L  | F  | G  | S  | K  | K  | R  | R  | R  | R  | 60 |  |  |  |  |  |  |  |  |  |             |
| 33      | <i>Alligator sinensis</i>        | Chinese Alligator       | K        | G  | S  | C  | D  | K  | N  | K  | L  | N  | V  | F  | S  | R  | V  | K  | L  | F  | G  | S  | K  | K  | R  | R  | R  | R  | 60 |  |  |  |  |  |  |  |  |  |             |
| 34      | <i>Eriothacus rubecula</i>       | European Robin          | K        | G  | S  | C  | D  | K  | N  | K  | L  | N  | V  | F  | S  | R  | V  | K  | L  | F  | G  | S  | K  | K  | R  | R  | R  | R  | 60 |  |  |  |  |  |  |  |  |  |             |
| 35      | <i>Phascogaster cinereus</i>     | Koala                   | K        | G  | S  | C  | D  | K  | N  | K  | L  | N  | V  | F  | S  | R  | V  | K  | L  | F  | G  | S  | K  | K  | R  | R  | R  | R  | 60 |  |  |  |  |  |  |  |  |  |             |
| 36      | <i>Alaudala cheleensis</i>       | Asian Short-Toed Lark   | K        | G  | S  | C  | D  | K  | N  | K  | L  | N  | V  | F  | S  | R  | V  | K  | L  | F  | G  | S  | K  | K  | R  | R  | R  | R  | 60 |  |  |  |  |  |  |  |  |  |             |
| 37      | <i>Chloropsis hardwickii</i>     | Orange-bellied Leafbird | K        | G  | S  | C  | D  | K  | N  | K  | L  | N  | V  | F  | S  | R  | V  | K  | L  | F  | G  | S  | K  | K  | R  | R  | R  | R  | 60 |  |  |  |  |  |  |  |  |  |             |
| 38      | <i>Turnix velox</i>              | Little Buttonquail      | K        | G  | S  | C  | D  | K  | N  | K  | L  | N  | V  | F  | S  | R  | V  | K  | L  | F  | G  | S  | K  | K  | R  | R  | R  | R  | 60 |  |  |  |  |  |  |  |  |  |             |
| 39      | <i>Taeniopygia guttata</i>       | Zebra Finch             | K        | G  | S  | C  | D  | K  | N  | K  | L  | N  | V  | F  | S  | R  | V  | K  | L  | F  | G  | S  | K  | K  | R  | R  | R  | R  | 60 |  |  |  |  |  |  |  |  |  |             |
| 40      | <i>Catharus ustulatus</i>        | Swainson's Thrush       | K        | G  | S  | C  | D  | K  | N  | K  | L  | N  | V  | F  | S  | R  | V  | K  | L  | F  | G  | S  | K  | K  | R  | R  | R  | R  | 60 |  |  |  |  |  |  |  |  |  |             |
| 41      | <i>Serinus canaria</i>           | Atlantic Canary         | K        | G  | S  | C  | D  | K  | N  | K  | L  | N  | V  | F  | S  | R  | V  | K  | L  | F  | G  | S  | K  | K  | R  | R  | R  | R  | 60 |  |  |  |  |  |  |  |  |  |             |
| 42      | <i>Gallus gallus</i>             | Red Junglefowl          | K        | G  | S  | C  | D  | K  | N  | K  | L  | N  | V  | F  | S  | R  | V  | K  | L  | F  | G  | S  | K  | K  | R  | R  | R  | R  | 60 |  |  |  |  |  |  |  |  |  |             |
| 43      | <i>Ornithorhynchus anatinus</i>  | Platyopus               | K        | G  | S  | C  | D  | K  | N  | K  | L  | N  | V  | F  | S  | R  | V  | K  | L  | F  | G  | S  | K  | K  | R  | R  | R  | R  | 60 |  |  |  |  |  |  |  |  |  |             |
| 44      | <i>Cercotrichas coryphoeus</i>   | Karoo Scrub Robin       | K        | G  | S  | C  | D  | K  | N  | K  | L  | N  | V  | F  | S  | R  | V  | K  | L  | F  | G  | S  | K  | K  | R  | R  | R  | R  | 60 |  |  |  |  |  |  |  |  |  |             |
| 45      | <i>Turdus rufiventris</i>        | Rufous-bellied thrush   | K        | G  | N  | C  | D  | K  | N  | K  | L  | N  | V  | F  | S  | R  | V  | K  | L  | F  | G  | S  | K  | K  | R  | R  | R  | R  | 60 |  |  |  |  |  |  |  |  |  |             |
| 46      | <i>Xenopus tropicalis</i>        | Western Clawed Frog     | K        | G  | N  | C  | E  | K  | N  | K  | L  | N  | V  | F  | S  | R  | V  | K  | L  | F  | G  | S  | K  | K  | R  | R  | R  | R  | 60 |  |  |  |  |  |  |  |  |  |             |
| 47      | <i>Rhinatrema bivittatum</i>     | Rhinatrema bivittatum   | K        | G  | N  | C  | E  | K  | N  | K  | L  | N  | V  | F  | S  | R  | V  | K  | L  | F  | G  | S  | K  | K  | R  | R  | R  | R  | 60 |  |  |  |  |  |  |  |  |  |             |
| 48      | <i>Chelonia mydas</i>            | Green Sea Turtle        | K        | G  | S  | C  | E  | K  | N  | K  | L  | N  | V  | F  | S  | R  | V  | K  | L  | F  | G  | S  | K  | K  | R  | R  | R  | R  | 60 |  |  |  |  |  |  |  |  |  |             |
| 49      | <i>Geotrypetes seraphini</i>     | Gaboon Caecilian        | K        | G  | N  | S  | E  | K  | N  | K  | L  | N  | V  | F  | S  | R  | V  | K  | L  | F  | G  | S  | K  | K  | R  | R  | R  | R  | 60 |  |  |  |  |  |  |  |  |  |             |
| 50      | <i>Gopherus evgoodei</i>         | Desert Tortoise         | K        | G  | S  | C  | E  | K  | N  | K  | L  | N  | V  | F  | S  | R  | V  | K  | L  | F  | S  | S  | K  | K  | R  | R  | R  | R  | 60 |  |  |  |  |  |  |  |  |  |             |
| 51      | <i>Chrysemys picta bellii</i>    | Western Painted Turtle  | K        | G  | S  | C  | E  | K  | N  | K  | L  | N  | V  | F  | S  | R  | V  | K  | L  | F  | S  | S  | K  | K  | R  | R  | R  | R  | 60 |  |  |  |  |  |  |  |  |  |             |
| 52      | <i>Papio anubis</i>              | Olive Baboon            | K        | T  | S  | C  | D  | K  | N  | K  | L  | N  | V  | F  | S  | R  | V  | K  | L  | F  | G  | S  | K  | K  | R  | R  | P  | R  | 60 |  |  |  |  |  |  |  |  |  |             |
| 53      | <i>Macaca mulatta</i>            | Rhesus Macaque          | K        | T  | S  | C  | D  | K  | N  | K  | L  | N  | V  | F  | S  | R  | V  | K  | L  | F  | G  | S  | K  | K  | R  | R  | P  | R  | 60 |  |  |  |  |  |  |  |  |  |             |

**Table S8**  
*(Related to Fig. 2)*

**Comparison of FGF14A CaMBD Sequences From 48 Species**

CaMBD Sequence Table (Completely Conserved Positions Highlighted in Yellow, Positions Conserved in ≥ 90% of Species Highlighted in Green)

| Species | Common Name                                             | Start Residue | CaMBD Sequence |    |    |    |    |    |    |    |    |    |    |    |    |    |    |    |    |    |    |    |    |    |    |    |    |    |    |    |  |  |  |  |  | End Residue |
|---------|---------------------------------------------------------|---------------|----------------|----|----|----|----|----|----|----|----|----|----|----|----|----|----|----|----|----|----|----|----|----|----|----|----|----|----|----|--|--|--|--|--|-------------|
|         |                                                         |               | 37             | 38 | 39 | 40 | 41 | 42 | 43 | 44 | 45 | 46 | 47 | 48 | 49 | 50 | 51 | 52 | 53 | 54 | 55 | 56 | 57 | 58 | 59 | 60 | 61 | 62 | 63 |    |  |  |  |  |  |             |
| 1       | <i>Calypste anna</i><br>Anna's Hummingbird              | 37            | R              | G  | L  | C  | N  | G  | N  | L  | V  | D  | I  | F  | S  | K  | V  | R  | I  | F  | G  | L  | K  | K  | R  | R  | L  | R  | R  | 63 |  |  |  |  |  |             |
| 2       | <i>Scleropages formosus</i><br>Asian Arowana            | 37            | K              | G  | L  | C  | N  | G  | N  | L  | V  | D  | I  | F  | S  | K  | V  | R  | I  | F  | G  | L  | R  | K  | R  | R  | L  | R  | R  | 63 |  |  |  |  |  |             |
| 3       | <i>Monopterus albus</i><br>Asian Swamp Eel              | 37            | K              | G  | L  | C  | N  | G  | N  | L  | V  | D  | I  | F  | S  | K  | V  | R  | I  | F  | G  | L  | R  | K  | R  | R  | L  | R  | R  | 63 |  |  |  |  |  |             |
| 4       | <i>Alectura lathamii</i><br>Australian Brushturkey      | 37            | R              | G  | L  | C  | N  | G  | N  | L  | V  | D  | I  | F  | S  | K  | V  | R  | I  | F  | G  | L  | K  | K  | R  | R  | L  | R  | R  | 63 |  |  |  |  |  |             |
| 5       | <i>Limosa lapponica baueri</i><br>Bar-tailed Godwit     | 37            | R              | G  | L  | C  | N  | G  | N  | L  | V  | D  | I  | F  | S  | K  | V  | R  | I  | F  | G  | L  | K  | K  | R  | R  | L  | R  | R  | 63 |  |  |  |  |  |             |
| 6       | <i>Pteropus alecto</i><br>Black Flying Fox              | 37            | R              | G  | L  | C  | N  | G  | N  | L  | V  | D  | I  | F  | S  | K  | V  | R  | I  | F  | G  | L  | K  | K  | R  | R  | L  | R  | R  | 63 |  |  |  |  |  |             |
| 7       | <i>Rattus rattus</i><br>Black Rat                       | 37            | R              | G  | L  | C  | N  | G  | N  | L  | V  | D  | I  | F  | S  | K  | V  | R  | I  | F  | G  | L  | K  | K  | R  | R  | L  | R  | R  | 63 |  |  |  |  |  |             |
| 8       | <i>Felis catus</i><br>Cat                               | 37            | R              | G  | L  | C  | N  | G  | N  | L  | V  | D  | I  | F  | S  | K  | V  | R  | I  | F  | G  | L  | K  | K  | R  | R  | L  | R  | R  | 63 |  |  |  |  |  |             |
| 9       | <i>Cricetulus griseus</i><br>Chinese Hamster            | 37            | R              | G  | L  | C  | N  | G  | N  | L  | V  | D  | I  | F  | S  | K  | V  | R  | I  | F  | G  | L  | K  | K  | R  | R  | L  | R  | R  | 63 |  |  |  |  |  |             |
| 10      | <i>Desmodus rotundus</i><br>Common Vampire Bat          | 37            | R              | G  | L  | C  | N  | S  | N  | L  | V  | D  | I  | F  | S  | K  | V  | R  | I  | F  | G  | L  | K  | K  | R  | R  | L  | R  | R  | 63 |  |  |  |  |  |             |
| 11      | <i>Cottoperca gobio</i><br>Cottoperca                   | 37            | K              | G  | L  | C  | N  | G  | N  | L  | V  | D  | I  | F  | S  | K  | V  | R  | I  | F  | G  | L  | R  | K  | R  | R  | L  | R  | R  | 63 |  |  |  |  |  |             |
| 12      | <i>Cynoglossus semilaevis</i><br>Cynoglossus semilaevis | 37            | K              | G  | L  | C  | N  | G  | N  | L  | V  | D  | I  | F  | S  | K  | V  | R  | I  | F  | G  | L  | R  | K  | R  | R  | L  | R  | R  | 63 |  |  |  |  |  |             |
| 13      | <i>Denticeps clupeioides</i><br>Denticle Herring        | 37            | K              | G  | L  | C  | N  | G  | N  | L  | V  | D  | I  | F  | S  | K  | V  | R  | I  | F  | G  | L  | R  | K  | R  | R  | L  | R  | R  | 63 |  |  |  |  |  |             |
| 14      | <i>Canis lupus dingo</i><br>Dingo                       | 37            | R              | G  | L  | C  | N  | G  | N  | L  | V  | D  | I  | F  | S  | K  | V  | R  | I  | F  | G  | L  | K  | K  | R  | R  | L  | R  | R  | 63 |  |  |  |  |  |             |
| 15      | <i>Camelus dromedarius</i><br>Dromedary                 | 37            | R              | G  | L  | C  | N  | G  | N  | L  | V  | D  | I  | F  | S  | K  | V  | R  | I  | F  | G  | L  | K  | K  | R  | R  | L  | R  | R  | 63 |  |  |  |  |  |             |
| 16      | <i>Electrophorus electricus</i><br>Electric Eel         | 37            | K              | G  | L  | C  | N  | G  | N  | L  | V  | D  | I  | F  | S  | K  | V  | R  | I  | F  | G  | L  | R  | K  | R  | R  | L  | R  | R  | 63 |  |  |  |  |  |             |
| 17      | <i>Anguilla anguilla</i><br>European Eel                | 37            | K              | G  | L  | C  | N  | G  | N  | L  | V  | D  | I  | F  | S  | K  | V  | R  | I  | F  | G  | L  | R  | K  | R  | R  | L  | R  | R  | 63 |  |  |  |  |  |             |
| 18      | <i>Geotrypetes seraphini</i><br>Gaboon Caecilian        | 37            | R              | G  | L  | C  | N  | G  | N  | L  | V  | D  | I  | F  | S  | K  | V  | R  | I  | F  | G  | L  | R  | K  | R  | R  | L  | R  | R  | 63 |  |  |  |  |  |             |
| 19      | <i>Aquila chrysaetos chrysaetos</i><br>Golden Eagle     | 37            | R              | G  | L  | C  | N  | G  | N  | L  | V  | D  | I  | F  | S  | K  | V  | R  | I  | F  | G  | L  | K  | K  | R  | R  | L  | R  | R  | 63 |  |  |  |  |  |             |
| 20      | <i>Microcebus murinus</i><br>Gray Mouse Lemur           | 37            | R              | G  | L  | C  | N  | G  | N  | L  | V  | D  | I  | F  | S  | K  | V  | R  | I  | F  | G  | L  | K  | K  | R  | R  | L  | R  | R  | 63 |  |  |  |  |  |             |
| 21      | <i>Mus musculus</i><br>House Mouse                      | 37            | R              | G  | L  | C  | N  | G  | N  | L  | V  | D  | I  | F  | S  | K  | V  | R  | I  | F  | G  | L  | K  | K  | R  | R  | L  | R  | R  | 63 |  |  |  |  |  |             |
| 22      | <i>Homo sapiens</i><br>Human                            | 37            | R              | G  | L  | C  | N  | G  | N  | L  | V  | D  | I  | F  | S  | K  | V  | R  | I  | F  | G  | L  | K  | K  | R  | R  | L  | R  | R  | 63 |  |  |  |  |  |             |
| 23      | <i>Clarias magur</i><br>Indian Catfish                  | 37            | K              | G  | L  | C  | N  | G  | N  | L  | V  | D  | I  | F  | S  | K  | V  | R  | I  | F  | G  | L  | R  | K  | R  | R  | L  | R  | R  | 63 |  |  |  |  |  |             |
| 24      | <i>Oryzias latipes</i><br>Japanese Rice Fish            | 37            | K              | G  | L  | C  | N  | G  | N  | L  | V  | D  | I  | F  | S  | K  | V  | R  | I  | F  | G  | L  | R  | K  | R  | R  | L  | R  | R  | 63 |  |  |  |  |  |             |
| 25      | <i>Trichechus manatus latirostris</i><br>Manatee        | 37            | R              | G  | L  | C  | N  | G  | N  | L  | V  | D  | I  | F  | S  | K  | V  | R  | I  | F  | G  | L  | K  | K  | R  | R  | L  | R  | R  | 63 |  |  |  |  |  |             |
| 26      | <i>Microcaecilia unicolor</i><br>Microcaecilia unicolor | 37            | R              | G  | L  | C  | N  | G  | N  | L  | V  | D  | I  | F  | S  | K  | V  | R  | I  | F  | G  | L  | R  | K  | R  | R  | L  | R  | R  | 63 |  |  |  |  |  |             |
| 27      | <i>Chanos chanos</i><br>Milkfish                        | 37            | K              | G  | L  | C  | N  | G  | N  | L  | V  | D  | I  | F  | S  | K  | V  | R  | I  | F  | G  | L  | R  | K  | R  | R  | L  | R  | R  | 63 |  |  |  |  |  |             |
| 28      | <i>Fundulus heteroclitus</i><br>Mummichog               | 37            | K              | G  | L  | C  | N  | G  | N  | L  | V  | D  | I  | F  | S  | K  | V  | R  | I  | F  | G  | L  | R  | K  | R  | R  | L  | R  | R  | 63 |  |  |  |  |  |             |
| 29      | <i>Dasylops novemcinctus</i><br>Nine-banded Armadillo   | 37            | R              | G  | L  | C  | N  | G  | N  | L  | V  | D  | I  | F  | S  | K  | V  | R  | I  | F  | G  | L  | K  | K  | R  | R  | L  | R  | R  | 63 |  |  |  |  |  |             |
| 30      | <i>Paramormyrops kingsleyae</i><br>Paramormyrops        | 37            | K              | G  | L  | C  | N  | G  | N  | L  | V  | D  | I  | F  | S  | K  | V  | R  | I  | F  | G  | L  | R  | K  | R  | R  | L  | R  | R  | 63 |  |  |  |  |  |             |
| 31      | <i>Chelonoidis abingdonii</i><br>Pinta Island Tortoise  | 37            | R              | G  | L  | C  | N  | G  | N  | L  | V  | D  | I  | F  | S  | K  | V  | R  | I  | F  | G  | L  | K  | K  | R  | R  | L  | R  | R  | 63 |  |  |  |  |  |             |
| 32      | <i>Microtus ochrogaster</i><br>Prairie Vole             | 37            | R              | G  | L  | C  | N  | G  | N  | L  | V  | D  | I  | F  | S  | K  | V  | R  | I  | F  | G  | L  | K  | K  | R  | R  | L  | R  | R  | 63 |  |  |  |  |  |             |
| 33      | <i>Takifugu flavidus</i><br>Pufferfish                  | 37            | K              | G  | L  | C  | N  | G  | N  | L  | V  | D  | I  | F  | S  | K  | V  | R  | I  | F  | G  | L  | R  | K  | R  | R  | L  | R  | R  | 63 |  |  |  |  |  |             |
| 34      | <i>Gallus gallus</i><br>Red Junglefowl                  | 37            | R              | G  | L  | C  | N  | G  | N  | L  | V  | D  | I  | F  | S  | K  | V  | R  | I  | F  | G  | L  | K  | K  | R  | R  | L  | R  | R  | 63 |  |  |  |  |  |             |
| 35      | <i>Erpetoichthys calabaricus</i><br>Reedfish            | 37            | R              | G  | L  | C  | N  | G  | N  | L  | V  | D  | I  | F  | S  | K  | V  | R  | I  | F  | G  | L  | R  | K  | R  | R  | L  | R  | R  | 63 |  |  |  |  |  |             |
| 36      | <i>Xiphophorus maculatus</i><br>Souther Platyfish       | 37            | K              | G  | L  | C  | N  | G  | N  | L  | V  | D  | I  | F  | S  | K  | V  | R  | I  | F  | G  | L  | R  | K  | R  | R  | L  | R  | R  | 63 |  |  |  |  |  |             |
| 37      | <i>Mirounga leonina</i><br>Southern Elephant Seal       | 37            | R              | G  | L  | C  | N  | G  | N  | L  | V  | D  | I  | F  | S  | K  | V  | R  | I  | F  | G  | L  | K  | K  | R  | R  | L  | R  | R  | 63 |  |  |  |  |  |             |
| 38      | <i>Nannospalax gallii</i><br>Spalax                     | 37            | R              | G  | L  | C  | N  | G  | N  | L  | V  | D  | I  | F  | S  | K  | V  | R  | I  | F  | G  | L  | R  | K  | R  | R  | L  | R  | R  | 63 |  |  |  |  |  |             |
| 39      | <i>Mustela erminea</i><br>Stoat                         | 37            | R              | G  | L  | C  | N  | G  | N  | L  | V  | D  | I  | F  | S  | K  | V  | R  | I  | F  | G  | L  | K  | K  | R  | R  | L  | R  | R  | 63 |  |  |  |  |  |             |
| 40      | <i>Thalassophryne amazonica</i><br>Toadfish             | 37            | K              | G  | L  | C  | N  | G  | N  | L  | V  | D  | I  | F  | S  | K  | V  | R  | I  | F  | G  | L  | R  | K  | R  | R  | L  | R  | R  | 63 |  |  |  |  |  |             |
| 41      | <i>Amazona aestiva</i><br>Turquoise-fronted Amazon      | 37            | R              | G  | L  | C  | N  | G  | N  | L  | V  | D  | I  | F  | S  | K  | V  | R  | I  | F  | G  | L  | K  | K  | R  | R  | L  | R  | R  | 63 |  |  |  |  |  |             |
| 42      | <i>Rhinatrema bivittatum</i><br>Two-tailed Caecilian    | 37            | R              | G  | L  | C  | N  | G  | N  | L  | V  | D  | I  | F  | S  | K  | V  | R  | I  | F  | G  | L  | R  | K  | R  | R  | L  | R  | R  | 63 |  |  |  |  |  |             |
| 43      | <i>Bubalus bubalis</i><br>Water Buffalo                 | 37            | R              | G  | L  | C  | N  | G  | N  | L  | V  | D  | I  | F  | S  | K  | V  | R  | I  | F  | G  | L  | K  | K  | R  | R  | L  | R  | R  | 63 |  |  |  |  |  |             |
| 44      | <i>Xenopus tropicalis</i><br>Western Clawed Frog        | 37            | R              | G  | L  | C  | N  | G  | N  | L  | V  | D  | I  | F  | S  | K  | V  | R  | I  | F  | G  | L  | R  | K  | R  | R  | L  | R  | R  | 63 |  |  |  |  |  |             |
| 45      | <i>Chrysemys picta bellii</i><br>Western Painted Turtle | 37            | R              | G  | L  | C  | N  | G  | N  | L  | V  | D  | I  | F  | S  | K  | V  | R  | I  | F  | G  | L  | K  | K  | R  | R  | L  | R  | R  | 63 |  |  |  |  |  |             |
| 46      | <i>Zonotrichia albicollis</i><br>White-throated Sparrow | 37            | R              | G  | L  | C  | N  | G  | N  | L  | V  | D  | I  | F  | S  | K  | V  | R  | I  | F  | G  | L  | K  | K  | R  | R  | L  | R  | R  | 63 |  |  |  |  |  |             |
| 47      | <i>Sus scrofa</i><br>Wild Boar                          | 37            | R              | G  | L  | C  | N  | G  | N  | L  | V  | D  | I  | F  | S  | K  | V  | R  | I  | F  | G  | L  | K  | K  | R  | R  | L  | R  | R  | 63 |  |  |  |  |  |             |
| 48      | <i>Mastacembelus armatus</i><br>Zig-zag Eel             | 37            | K              | G  | L  | C  | N  | G  | N  | L  | V  | D  | I  | F  | S  | K  | V  | R  | I  | F  | G  | L  | R  | K  | R  | R  | L  | R  | R  | 63 |  |  |  |  |  |             |
